1 **Title:** Arc1 modulates microbiota-responsive developmental and metabolic traits in  
2 *Drosophila*

3

4 **Running Title:** Arc1 and *Acetobacter* promote fly growth

5 **Keywords:** *Drosophila*, microbiota, *Acetobacter*, Arc1, insulin signaling, metabolism

6

7 Scott A. Keith\*, Cassandra Bishop\*†, Samantha Fallacaro\*†, Brooke M. McCartney\*

8

9 \* Department of Biological Sciences, Carnegie Mellon University, Pittsburgh, PA 15213

10 † Equal contribution

11

12 **Corresponding author:**

13 Brooke M. McCartney

14 600D Mellon Institute

15 Department of Biological Sciences

16 Carnegie Mellon University

17 4400 Fifth Avenue

18 Pittsburgh, PA 15213

19 Phone: (412) 268-5195

20 Email: [bmccartney@cmu.edu](mailto:bmccartney@cmu.edu)

21

22

23

24

25 **SUMMARY**

26 *Drosophila* Arc1 exhibits microbiota-dependent, tissue-specific differential expression,  
27 mitigates the impacts of germ-free rearing on insulin signaling and growth rate, but is  
28 dispensable for metabolic homeostasis in *Acetobacter*-colonized flies.

29 **ABSTRACT**

30 Perturbations to animal-associated microbial communities (the microbiota) have  
31 deleterious effects on various aspects of host fitness, including dysregulated energy  
32 metabolism. However, the molecular processes underlying these microbial impacts on  
33 the host are poorly understood. In this study, we identify a novel connection between the  
34 microbiota and the neuronal factor Arc1 that affects metabolism and development in  
35 *Drosophila*. We find that *Arc1* exhibits tissue-specific microbiota-dependent expression  
36 changes, and that flies bearing a null mutation of *Arc1* complete larval development at a  
37 dramatically slowed rate compared to wild-type animals. In contrast, monoassociation  
38 with a single *Acetobacter* sp. isolate was sufficient to enable *Arc1* mutants to develop at  
39 a wild-type rate. These developmental phenotypes are highly sensitive to composition of  
40 the larval diet, suggesting the growth rate defects of GF flies lacking Arc1 reflect metabolic  
41 dysregulation. Additionally, we show that pre-conditioning the larval diet with *Acetobacter*  
42 sp. partially accelerates *Arc1* mutant development, but live bacteria are required for the  
43 full growth rate promoting effect. Finally, GF *Arc1* mutants display multiple traits  
44 consistent with reduced insulin signaling activity that are reverted by association with  
45 *Acetobacter* sp., suggesting a potential mechanism underlying the microbe-dependent  
46 developmental phenotypes. Our results reveal a novel role for Arc1 in modulating insulin

47 signaling, metabolic homeostasis, and growth rate that is specific to the host's microbial  
48 and nutritional environment.

## 49 INTRODUCTION

50 The physiology and life history traits of animals are shaped in remarkable ways by  
51 interactions with commensal and beneficial microorganisms (the microbiota). For many  
52 metazoans, microbial symbionts play integral roles in post-embryonic development and  
53 physiology to yield fit and fertile adults (McFall-Ngai et al., 2013; Robertson et al., 2019).  
54 Thus, perturbations to the microbiota can have profoundly deleterious consequences for  
55 its animal host. For example, germ free (GF) or antibiotic-treated mice exhibit decreased  
56 body fat (Smith et al., 2007), abnormal intestinal epithelial architecture (Hayes et al.,  
57 2018), fewer differentiated immune cells (Ekmekci et al., 2017), and  
58 neurodevelopmental defects (Sampson and Mazmanian, 2015). In humans, dysbiosis of  
59 the gut microbiota has been implicated in the pathogenesis of a wide range of disorders,  
60 such as Type 2 diabetes (Larsen et al., 2010), obesity (Shen et al., 2013), and autism  
61 (Gilbert et al., 2013). However, the molecular factors that actuate microbial influence on  
62 host physiology and development are not comprehensively understood. *Drosophila*  
63 *melanogaster* and its gut microbiota are an ideal model to discover such factors given  
64 *Drosophila*'s extensive genetic resources, the low-diversity and readily-cultured bacterial  
65 communities associated with laboratory fly cultures, and the consequent technical ease  
66 of generating GF and gnotobiotic fly populations (Broderick and Lemaitre, 2012; Douglas,  
67 2018; Martino et al., 2017).

68 From a screen to discover microbiota-responsive neuronal genes, we identified  
69 *Drosophila Activity-regulated cytoskeleton associated protein 1* (*Arc1*) as being

70 differentially expressed in GF flies. *Arc1* is a *Drosophila* homolog of mammalian  
71 *Arc/Arg3.1*, an immediate early gene and master regulator of synaptic plasticity in the  
72 brain (Carmichael and Henley, 2018; Shepherd and Bear, 2011). *Arc* transcription is  
73 highly upregulated by synaptic activity and while the brain is encoding novel information  
74 into neural circuits (Chen et al., 2020; Guzowski et al., 1999). Accordingly, reduced *Arc*  
75 expression impairs memory formation and learning ability in rodents (Guzowski et al.,  
76 2000; Shandilya and Gautam, 2020), and defects in human *Arc* function have been linked  
77 to a variety of neurological and neurodevelopmental disorders, including Alzheimer's  
78 disease (Bi et al., 2018), autism spectrum disorders (Alhowikan, 2016), and schizophrenia  
79 (Fromer et al., 2014). *Arc* partially regulates synaptic plasticity by interacting with  
80 endocytic machinery to regulate synaptic surface presentation of AMPA-type glutamate  
81 receptors (Chowdhury et al., 2006; DaSilva et al., 2016; Wall and Corrêa, 2018). Both  
82 mammalian *Arc* and fly *Arc1* encode retroviral group-specific antigen-like amino acid  
83 sequences, and are predicted to have independently derived from ancient Ty3/Gypsy  
84 retrotransposons (Ashley et al., 2018; Campillos et al., 2006; Cottee et al., 2019;  
85 Pastuzyn et al., 2018). Recently, it was shown that *Arc* and *Arc1* proteins can self-  
86 assemble into capsid-like structures that package and transport mRNAs (including  
87 *Arc/Arc1* mRNA) into cultured neuronal cell lines and across synapses *in vivo*, constituting  
88 a novel mechanism of cell-cell communication (Ashley et al., 2018; Erlendsson et al.,  
89 2019; Pastuzyn et al., 2018).

90 As with mammalian *Arc*, *Drosophila Arc1* expression is strongly upregulated by  
91 neuronal activation (Guan et al., 2005; Mattaliano et al., 2007; Montana and Littleton,  
92 2006; Mosher et al., 2015). At the larval neuromuscular junction (NMJ), *Arc1* protein-

93 mediated transfer of *Arc1* mRNA from the boutons of motoneurons to post-synaptic  
94 myocytes appears to be required for appropriate synapse maturation and synaptic  
95 plasticity (Ashley et al., 2018). Further, *Arc1* loss-of-function mutants have elevated fat  
96 levels, altered metabolomic profiles, are starvation resistant, and differentially express a  
97 repertoire of enzymes involved in central carbon metabolism (Mattaliano et al., 2007;  
98 Mosher et al., 2015). These phenotypes may be at least partially attributable to *Arc1*  
99 activity in the brain, where its expression in adults is concentrated in a subset of large  
100 neurons in the pars intercerebralis (Mattaliano et al., 2007). However, the precise cellular  
101 pathways and mechanisms through which it affects metabolism are not known.

102         In *Drosophila*, metabolic functions directly impact developmental timing and whole-  
103 organism growth that occurs exclusively during the larval stages (Edgar, 2006). Fly larvae  
104 progress through three developmental instars, increasing in size approximately 200-fold  
105 prior to pupariation and metamorphosis (Robertson, 1963). Both the timing of  
106 developmental progression and the magnitude of larval growth are genetically regulated  
107 by multiple intersecting nutrient-responsive inter-organ signaling pathways, including the  
108 insulin/insulin-like growth factor (IIS) pathway (Brogiolo et al., 2001; Rulifson et al., 2002),  
109 the 20-hydroxyecdysone biosynthetic pathway (Buhler et al., 2018; McBrayer et al.,  
110 2007), and target-of-rapamycin (TOR) signaling (Colombani et al., 2003; Layalle et al.,  
111 2008). IIS and TOR signaling are highly functionally conserved between *Drosophila* and  
112 vertebrates (Edgar, 2006; Gilbert, 2008). The microbiota also has a significant impact on  
113 fly metabolism; GF larvae exhibit prolonged larval development and stunted growth  
114 compared to conventionally-reared or gnotobiotic flies (Newell and Douglas, 2014; Shin  
115 et al., 2011; Storelli et al., 2011; Storelli et al., 2017; Wong et al., 2014). Commensal

116 bacteria appear to impact *Drosophila* growth through numerous mechanisms, including  
117 nutritional provisioning and activation of host signaling pathways via secreted metabolites  
118 (Chaston et al., 2014; Consuegra et al., 2020; Kamareddine et al., 2018; Keebaugh et al.,  
119 2018; Matos et al., 2017; Sannino et al., 2018; Shin et al., 2011). However, many gaps  
120 remain in our understanding of the molecular mechanisms linking the bacterial microbiota  
121 to larval metabolic function and growth dynamics.

122 Here we reveal *Arc1* as a novel host factor that modulates the microbiota's impact  
123 on larval growth. *Arc1* is transcriptionally altered in tissue-specific patterns in GF flies,  
124 and loss of *Arc1* dramatically exacerbates the developmental growth delay of GF larvae.  
125 We further show that a single *Acetobacter* isolate is sufficient to restore normal larval  
126 development in *Arc1* mutants, and that pre-conditioning the larval diet with this  
127 *Acetobacter sp.* partly restores a normal growth rate to GF *Arc1* mutants. We further show  
128 that loss of both *Arc1* and the microbiota results in multiple traits consistent with reduced  
129 insulin/insulin-like growth factor (IIS) pathway activity, and that monoassociation with  
130 *Acetobacter sp.* reduces the severity of these phenotypes. Together our data reveal an  
131 experimental system wherein a single microbiota member supports the health of a  
132 metabolically destabilized host genotype. Further, this work demonstrates a previously  
133 unrecognized role for *Arc1* in altering insulin signaling in flies following microbiota  
134 removal.

## 135 **RESULTS**

### 136 **The microbiota promote larval development of *Arc1*-deficient *Drosophila* hosts**

137 To identify host neuronal molecules and pathways that may be impacted by the  
138 microbiota, we conducted a transcriptomic screen to identify *Drosophila* genes that are

139 differentially expressed in adult fly heads upon elimination of the bacterial microbiota.  
140 From this work, we identified *Arc1* among the genes that were most responsive to host  
141 microbial condition (Keith et al., 2019, bioRxiv). Specifically, we found that *Arc1*  
142 transcripts are elevated in the heads of adult wild-type *Drosophila* grown under germ-free  
143 conditions (GF; microbiologically sterile) compared to flies grown in gnotobiotic (GNO)  
144 polyassociation with a four-species bacterial community consisting of two *Acetobacter*  
145 (*Acetobacter* sp., *A. pasteurianus*) and two *Lactobacillus* (*L. brevis*, *L. plantarum*) isolates  
146 (Figure 1A). Notably, in published RNA-seq datasets comparing the gut transcriptomes  
147 of microbiota-associated *Drosophila* to GF guts, *Arc1* is among the significantly  
148 differentially expressed genes (Bost et al., 2017; Dobson et al., 2016; Guo et al., 2014;  
149 Petkau et al., 2017); consistent with these studies, we found that *Arc1* is transcriptionally  
150 decreased in the adult GF gut (Figure 1A). These microbiota-sensitive transcript level  
151 changes occur in multiple wild-type fly lines, but both changes were not observed in every  
152 wild type line (Figure 1A). Together our data demonstrate that *Arc1* is a microbiota-  
153 responsive gene, and the transcript response exhibits tissue specificity.

154 *Arc1* regulates lipid homeostasis and central carbon metabolite levels in  
155 *Drosophila* larvae (Mosher et al., 2015), and an *Arc1* loss of function mutant exhibits  
156 enhanced starvation resistance in adult flies (Mattaliano et al., 2007). Intriguingly, recent  
157 studies have shown that these and other metabolic traits are also impacted by the  
158 microbiota, depending on dietary conditions and host genetic background (reviewed in  
159 Douglas, 2018). One of the major organism-level consequences of GF-induced metabolic  
160 dysregulation in *Drosophila* is a prolonged larval growth period (Strigini and Leulier,  
161 2016). Thus, to test for a physiologically relevant interaction between the microbiota and

162 *Arc1* function, we raised wild-type flies ( $w^{1118}$ ) and a fly line bearing a CRISPR-mediated  
163 deletion of *Arc1* (*Arc1<sup>E8</sup>*; Ashley et al., 2018) from embryo to adulthood either GF or GNO,  
164 and monitored their larval growth rate. Consistent with many previous reports (Chaston  
165 et al., 2014; Consuegra et al., 2020; Erkosar et al., 2015; Kamareddine et al., 2018;  
166 Keebaugh et al., 2018; Newell and Douglas, 2014; Sannino et al., 2018; Shin et al., 2011;  
167 Storelli et al., 2011; Storelli et al., 2017; Wong et al., 2014), we found that GNO wild-type  
168 animals completed larval development faster than their GF siblings (Figure 1B). On our  
169 laboratory's routine diet (see Material and Methods) at 23°C, wild-type GNO cultures take  
170 ~7 days to complete larval development, and this period is extended by ~1.5 days under  
171 GF conditions (Figure 1B, Table S1). Strikingly, the larval growth delay induced by  
172 microbiota elimination was dramatically extended in larvae lacking *Arc1*. While *Arc1<sup>E8</sup>*  
173 mutant larvae grown under GNO conditions developed at a rate indistinguishable from  
174 wild-type GNO larvae, GF *Arc1<sup>E8</sup>* animals took on average ~12 days to complete larval  
175 development (Figure 1B). These differences in larval growth rate were reflected in the  
176 rate of adult emergence, with wild-type and *Arc1<sup>E8</sup>* GNO animals eclosing ~12.5 days  
177 after embryo deposition, wild-type GF eclosing after ~14 days, and *Arc1<sup>E8</sup>* GF adults  
178 emerging asynchronously between 16-20 days (Figure S1A). We observed a similar,  
179 though less protracted, developmental delay for two independently-generated *Arc1* loss-  
180 of-function alleles (*Arc1<sup>esm18</sup>* and *Arc1<sup>esm113</sup>*; Mattaliano et al., 2007) under GF conditions  
181 (Figures S1B, C), and in GF animals transheterozygous for *Arc1<sup>E8</sup>* and *Arc1<sup>esm113</sup>* (Figure  
182 1C). Further, ablation of *Arc1*-expressing cells using *Arc1-GAL4* (Mattaliano et al., 2007)  
183 to drive expression of the pro-apoptotic *reaper* also extended the developmental period  
184 of GF larvae (Figure 1D). All larvae bearing loss of function mutations in *Arc1* or ablation



185 of *Arc1* expressing cells developed at the wild type rate when grown with the GNO  
186 bacterial community. *Arc2* is another *Drosophila* Arc homolog in a genomic locus adjacent  
187 to *Arc1*; the two proteins likely represent an ancestral duplication event (Pastuzyn et al.,  
188 2018). In contrast to *Arc1* depletion, a P-element insertion in the *Arc2* 3' UTR which  
189 decreased *Arc2* expression (Figure S1D) had no effect on the developmental rate of GF  
190 larvae (Figure S1E). Together these results suggest a reciprocal host gene-microbe  
191 interaction: the bacterial microbiota facilitates the appropriate larval growth rate of *Arc1*-  
192 deficient larvae, and *Arc1* is a novel host protein that modulates the physiological  
193 response to microbiota loss during larval development.

#### 194 **Monoassociation with *Acetobacter* sp. is sufficient to promote larval development** 195 **of *Arc1* mutant larvae**

196 We next asked whether the ability of our polymicrobial GNO community to promote  
197 larval growth rate was attributable to the effects of individual bacterial taxa or collective  
198 effects of the community. To this end, we generated wild-type and *Arc1* null fly cultures  
199 in monoassociation with each of the four bacteria and measured time to complete larval  
200 development. Wild-type larvae monoassociated with each of the four bacteria developed  
201 significantly faster than their GF siblings, with the two *Acetobacter* isolates promoting  
202 slightly faster development than the two *Lactobacillus* isolates (Figure 2A). In contrast,  
203 only *Arc1*<sup>E8</sup> mutant larvae monoassociated with *Acetobacter* sp. developed at an identical  
204 rate to polyassociated GNO larvae; *Arc1* mutants associated with *A. pasteurianus*, *L.*  
205 *brevis*, and *L. plantarum* all developed at the same rate, ~2 days faster than GF, but ~2.5-  
206 3 days slower than GNO and *Acetobacter* sp. monoassociated larvae (Figure 2B). While  
207 we did find significant differences in bacterial load among the four isolates, these

208 differences did not correlate with the impact of each bacteria on host developmental rate  
209 for either genotype (Figure S2).

210 Because *Acetobacter sp.* alone was sufficient to enable *Arc1<sup>E8</sup>* larvae to achieve  
211 a wild-type growth rate, we asked whether it would also be necessary in the four-species  
212 GNO community. Surprisingly, while mutant larvae associated with *A. pasteurianus*, *L.*  
213 *brevis*, and *L. plantarum* alone developed substantially slower than those associated with  
214 the four-species group or *Acetobacter sp.*, the three together in a GNO community lacking  
215 *Acetobacter sp.* were sufficient to promote normal development. However, for  
216 experimental tractability we focused all subsequent investigation on wild type and *Arc1*  
217 mutants monoassociated with *Acetobacter sp.*.

218 While the delayed pupariation rate of wild-type GF larvae reflects a moderately  
219 extended duration of all three larval instars (Figure 2C; Storelli et al., 2011), *Arc1<sup>E8</sup>* GF  
220 larvae undergo substantially prolonged L1 and L2 phases (Figure 2C). Further, GF  
221 animals of both genotypes increase in size at a more gradual rate than those with  
222 *Acetobacter sp.*, but this effect is highly exaggerated in *Arc1* mutants, suggesting a longer  
223 time to attain the critical weights that trigger each molt and metamorphosis (Figure 2D;  
224 Mirth et al., 2005). The extended larval period could reflect reduced food consumption,  
225 but we did not observe feeding differences in *Arc1*-deficient larvae under either microbial  
226 condition (Figure S3). Along with a lengthened time to pupariation, both wild-type and  
227 *Arc1<sup>E8</sup>* GF larvae develop into smaller pupae, but, as with the developmental delay, this  
228 size reduction is greater for animals lacking *Arc1* (Figure 2E). These data suggest that  
229 loss of *Arc1* exacerbates the effects of GF rearing on both larval growth rate and growth  
230 capacity.

## 231 **Host diet can modulate the *Arc1*-dependent GF larval developmental delay**

232 The developmental rate of wild type GF larvae is particularly sensitive to the  
233 concentration of dietary yeast, the primary source of ingested amino acids: the  
234 developmental lag of GF compared to conventional (CV) or GNO animals increases on  
235 diets with low yeast content, while feeding high-yeast diets enables GF larvae to develop  
236 at the same rate as microbe-associated larvae (Shin et al., 2011; Storelli et al., 2011;  
237 Wong et al., 2014). To determine how the loss of *Arc1* impacts the dietary sensitivity of  
238 GF larvae, we reared *Acetobacter sp.*-associated and GF wild-type and *Arc1<sup>E8</sup>* larvae on  
239 nine simplified diets containing systematically varied concentrations of dextrose and  
240 yeast, and monitored time to pupariation (Figure 3).

241 As expected, in wild-type animals “high-yeast” (10%) diets eliminated the  
242 developmental gap between *Acetobacter sp.*-associated and GF larvae, regardless of  
243 glucose concentration, while on “low-yeast” (3%) diets wild-type GF larvae were  
244 consistently delayed. The exception to this was the 3% yeast-10% glucose diet, which  
245 substantially slowed the developmental rate of all conditions, a known effect of high-  
246 sugar, low-protein diets (Musselman et al., 2011; Wong et al., 2014). Interestingly, on 5%  
247 yeast diets, increasing glucose concentration moderately accelerated the development of  
248 wild-type GF larvae, with a statistically significant delay observed only at the lowest  
249 glucose level. Overall, these data are congruent with published observations that GF  
250 rearing predominantly sensitizes wild-type flies to reductions in dietary protein content.

251 GF larvae lacking *Arc1* generally showed enhanced developmental sensitivity to  
252 dietary composition; GF *Arc1<sup>E8</sup>* animals developed more slowly than GF wild-type on five  
253 out of the nine tested diets (Figure 3). Notably, GF *Arc1<sup>E8</sup>* larvae were even delayed on

254 two “high-yeast” diets (10% yeast-3% glucose and 10% yeast-10% glucose), where the  
255 wild type GF larvae developed at same rate as wild type *Acetobacter sp.* animals. On  
256 most diets, *Arc1* mutants associated with *Acetobacter sp.* developed at the same rate as  
257 wild-type *Acetobacter sp.*-associated larvae. One notable exception was the 3% yeast-  
258 5% glucose diet, where *Acetobacter sp.* failed to have any growth rate promoting activity  
259 for *Arc1<sup>E8</sup>* larvae.

260         Importantly, while *Arc1*-deficient larvae grown GF still displayed a lengthened  
261 duration of larval development on multiple diets, none of the tested formulations yielded  
262 a magnitude of delay comparable to that observed on our laboratory’s routine diet (Figure  
263 1B). To compare the nutritional contents of the yeast-glucose diets to our cornmeal-yeast-  
264 molasses diet (see Materials and Methods), we utilized the *Drosophila* Dietary  
265 Composition Calculator to determine the protein:carbohydrate (P:C) ratio of each recipe  
266 (Figure 3; Lesperance and Broderick, 2020). Relative to most of the tested yeast-glucose  
267 diets, our laboratory diet has a low P:C ratio of 0.06. Interestingly, the yeast-glucose diet  
268 with the P:C ratio closest to that of our diet (3% yeast-10% glucose; P:C 0.09) did not  
269 recapitulate the microbe-dependent developmental rate trends observed on our diet;  
270 specifically, *Acetobacter sp.*-associated wild-type and *Arc1* mutant larvae developed  
271 substantially slower on this yeast-glucose diet than on our diet. This may indicate that the  
272 full growth rate promoting effects of this *Acetobacter sp.* are specific to the more complex  
273 nutritional substrate of the cornmeal-yeast-molasses diet and less dependent on the  
274 relative proportions of these two macronutrients. For example, cornmeal provides sugars  
275 in the form of complex polysaccharides that require a multi-step breakdown process  
276 involving amylases and maltases, which have previously been shown to be microbiota

277 responsive in *Drosophila* larvae (Erkosar et al., 2017). Additionally, differences in  
278 *Acetobacter* sp. developmental support could be due to different levels of bacterial  
279 population growth on the various diets.

280 Together, these results indicate that the importance of *Arc1* function during GF  
281 larval development is highly dependent on the host's nutritional environment, and suggest  
282 that *Arc1* may be particularly important for GF animals' metabolic responses to dietary  
283 amino acid availability.

284 **Live *Acetobacter* sp. populations are required for optimal *Arc1* mutant**  
285 **developmental rate**

286 We next sought to investigate the mechanisms by which *Acetobacter* sp.  
287 association enables *Arc1*-deficient animals to complete larval development at the same  
288 rate as wild-type monoassociated animals. Given that increasing the concentration of  
289 dietary yeast can substantially diminish the prolonged larval stage of GF *Arc1* mutant  
290 larvae, we hypothesized that bacteria consumed with the diet may serve as a  
291 supplemental food source supporting *Arc1*<sup>E8</sup> development, a mechanism for which there  
292 is precedent in wild-type *Drosophila* (Bing et al., 2018; Keebaugh et al., 2018; Storelli et  
293 al., 2017). To test this prediction, we inoculated GF wild-type and *Arc1*<sup>E8</sup> cultures with  
294 heat-killed *Acetobacter* sp. cells daily throughout the larval developmental period until the  
295 entire population pupariated. Administration of heat-killed *Acetobacter* resulted in a slight,  
296 but not statistically significant, acceleration of developmental rate for GF *Arc1* mutants  
297 (Figure 4A). Feeding with dead *Acetobacter* cells had no effect on wild-type GF larval  
298 developmental rate (Figure 4A). These data suggest *Acetobacter* sp. does not solely  
299 serve as a nutritional supplement to promote *Arc1* mutant development.

300           The *Acetobacteraceae* are distinguished by the ability to generate acetic acid  
301 through partial oxidation of ethanol and other substrates (Saichana et al., 2015). Two  
302 studies showed that acetic acid/acetate consumption enables GF larvae or larvae  
303 associated with an *Acetobacter* mutant deficient for acetic acid production to develop at  
304 a rate comparable to those associated with live bacteria (Kamareddine et al., 2018; Shin  
305 et al., 2011); in contrast, acetic acid has also been reported to yield no effect on growth  
306 in a GF context, or, at higher concentrations, further extends the GF larval growth delay  
307 (Kim et al., 2017; Shin et al., 2011). Consistent with the latter results, we found that  
308 providing GF wild type or *Arc1<sup>E8</sup>* larvae with dietary acetic acid at different concentrations  
309 either had no impact on growth rate, or increased the duration of larval development  
310 (Figure 4C, C'). This suggests that any acetic acid generation by our *Acetobacter sp.*  
311 isolate has minimal impact on larval growth under our dietary and husbandry conditions.  
312 We also found that daily inoculation with filtered supernatant from planktonic *Acetobacter*  
313 *sp.* cultures had no effect on either wild-type or *Arc1<sup>E8</sup>* GF larvae, providing no evidence  
314 to support a role for metabolite(s) secreted in *Acetobacter sp.* planktonic culture in  
315 promoting larval growth rate (Figure 4B).

316           The association of larval and adult *Drosophila* with their commensals involves  
317 bacterial proliferation on the flies' diet and consequent continual ingestion of live and dead  
318 bacterial cells associated with the food bolus (Ludington and Ja, 2020). The host and its  
319 microbial partners therefore share a dietary niche, with the bacteria utilizing the flies' food  
320 as a carbon source (Blum et al., 2013; Martino et al., 2018; Storelli et al., 2017). Prior  
321 work suggests that certain microbe-affected metabolic traits in *Drosophila*, including  
322 growth rate, result from bacterial utilization of dietary nutrients (Consuegra et al., 2020;

323 Huang and Douglas, 2015; Storelli et al., 2017). These microbiota-dependent host traits  
324 therefore arise from bacterial modification of the flies' diet, resulting in an altered  
325 nutritional intake. We hypothesized that bacterial dietary modification might underlie  
326 *Acetobacter sp.* support of *Arc1* mutant development. To test this hypothesis, we  
327 inoculated GF food vials with *Acetobacter sp.* planktonic culture, allowed colonization of  
328 the diet for five days, and then heat-treated the vials to kill all bacteria, resulting in an  
329 *Acetobacter sp.*-conditioned but microbiologically sterile larval food substrate.

330 When fed the conditioned diet, wild-type GF larvae also developed slightly, though  
331 not significantly, faster than wild-type GF larvae on regular sterile food, and on un-  
332 inoculated sterile food subjected to the same heat treatment used to sterilize conditioned  
333 media (Figure 4D). In contrast, *Acetobacter sp.*-conditioned food substantially  
334 accelerated GF *Arc1<sup>E8</sup>* larval development compared to GF larvae on untreated and  
335 heated control diets, though still ~1.5 days slower than *Arc1* mutants associated with live  
336 *Acetobacter sp.* (Figure 4D'). These data suggest that *Acetobacter sp.* modification of the  
337 larval diet may be an important, though not exclusive, mechanism by which this bacterial  
338 isolate promotes larval growth rate.

### 339 **Germ free rearing alters metabolic defects of *Arc1* mutant animals and reduces** 340 **insulin signaling**

341 The rate of larval growth and development in *Drosophila* is an organism-level  
342 readout of systemic energy metabolism. Specifically, growth is promoted by the activation  
343 of multiple circulating-hormone-regulated signaling pathways, including the  
344 insulin/insulin-like signaling (IIS) pathway, which are responsive to and downstream of  
345 nutrient intake (Edgar, 2006). Following food consumption, insulin-like peptides (Ilps) are

346 synthesized by neuroendocrine cells in the brain and released into the hemolymph  
347 (Géminard et al., 2009). IIS then circulate to principal metabolic tissues, including the fat  
348 body, and activate the insulin receptor (InR; Brogiolo et al., 2001; DiAngelo and Birnbaum,  
349 2009). This results in the nuclear exclusion of the transcription factor Foxo, the  
350 suppression of starvation responses, and growth promotion (Jünger et al., 2003; Kramer  
351 et al., 2003). Decreased IIS activity results in a larval growth delay, or in the most severe  
352 cases a complete growth arrest (reviewed in Baker and Thummel, 2007). Furthermore, in  
353 wild-type animals fed nutrient restrictive diets, individual commensal bacteria, including  
354 some *Acetobacter*, may promote larval growth and development in part via activation of  
355 host IIS (Kamareddine et al., 2018; Shin et al., 2011; Storelli et al., 2011). *Arc1* has been  
356 previously implicated in metabolic homeostasis (Mosher et al., 2015), but not IIS signaling  
357 (Mattaliano et al., 2007). Further, we have shown that the growth rate of GF *Arc1* mutants  
358 is delayed and sensitive to dietary composition (Figure 3), consistent with metabolic  
359 dysregulation. Thus, we hypothesized that the developmental delay of *Arc1<sup>E8</sup>* GF larvae  
360 is a consequence of reduced IIS activity, and that *Acetobacter sp.* supports an appropriate  
361 *Arc1<sup>E8</sup>* growth rate by restoring proper IIS signaling.

362 In addition to a reduction in larval growth rate, loss of IIS signaling results in other  
363 growth defects. This includes a reduction in wing size, due to a reduction in cell number  
364 and cell size (Figure 5A; Rulifson et al., 2002). While wild-type GF larvae have a  
365 decreased larval growth rate (Figure 1B), and final larval size (Figure 2E), we did not  
366 observe any alteration to wing growth properties: cell size (inferred by cell density), cell  
367 number, and wing size were indistinguishable from that of *Acetobacter sp.*-associated



368 wild type animals (Fig. 5B-D). This may suggest that larval growth rate is particularly  
369 sensitive to metabolic perturbations under our culture conditions.

370 *Arc1* mutants grown under GF conditions exhibited a significant reduction in cell  
371 size, consistent with reduced IIS activity, whereas *Acetobacter sp.*-associated mutant  
372 wings had wild-type sized cells (Figure 5A,B). Surprisingly, though, loss of *Arc1* increased  
373 cell number, regardless of microbial condition (Figure 5A,C). Since cell size was  
374 unaffected in *Arc1<sup>E8</sup>-Actobacter sp.* flies, this resulted in larger wings for these animals,  
375 whereas GF *Arc1<sup>E8</sup>* wings were the same size as wild-type wings, due to their reduced  
376 cell size (Figure 5A,D). While increased IIS activity is associated with larger wings, this is  
377 accompanied by an increase in cell size (Brogiolo et al., 2001). This suggests that *Arc1*  
378 may also contribute to wing growth through unknown additional mechanisms.

379 In addition to growth changes, loss of IIS pathway activity also results in resistance  
380 to adult starvation conditions (Broughton et al., 2005). *Arc1<sup>esm18</sup>* mutants are likewise  
381 starvation resistant (Mattaliano et al., 2007). We observed the same phenotype, with  
382 *Arc1<sup>E8</sup> Acetobacter sp.* females taking longer to succumb to starvation than wild type  
383 *Acetobacter sp.* and wild type GF adults. This starvation resistance was strongly  
384 enhanced in GF *Arc1<sup>E8</sup>* animals, which survived full nutrient deprivation ~two days longer  
385 than wild type animals (Figure 5E). Reduced mobilization of energy stores under  
386 starvation conditions is another consequence of reduced IIS activity (Broughton et al.,  
387 2005; Luong et al., 2006). Thus, the strongly enhanced starvation survival of GF *Arc1*  
388 mutants, are consistent with deficient IIS function in the absence of *Arc1* and the  
389 microbiota.

390           Activation of the insulin receptor (InR) results in the activation of PI3K increasing  
391 the membrane phospholipid PIP<sub>3</sub> (Britton et al., 2002). This produces a membrane-  
392 associated binding site for proteins containing the Plextrin homology (PH) domain,  
393 including the IIS effector Akt (Verdu et al., 1999). tGPH is a GFP-tagged PH domain that  
394 has been widely used as an *in vivo* reporter of PI3K activity and IIS pathway activation  
395 (Britton et al., 2002). In *Acetobacter sp.*-associated wild-type and *Arc1<sup>E8</sup>* larvae and in  
396 wild-type GF larvae, we observed a strong membrane localization of tGPH in the fat body  
397 that was indistinguishable between those genotypes and conditions (Fig. 5F), suggesting  
398 that IIS signaling is not significantly perturbed in these larvae. In contrast, we found that  
399 the membrane localization of tGPH was strongly reduced in the larval fat body of GF  
400 *Arc1<sup>E8</sup>* animals (Fig. 5F), indicative of reduced IIS pathway activation. Together these  
401 data demonstrate that aside from the larval growth delay, wild type GF larvae do not have  
402 phenotypes associated with reduced IIS signaling. However, when *Arc1* is also  
403 eliminated, these animals exhibit many hallmarks of IIS deficiency. Likewise, *Arc1* mutant  
404 *Acetobacter sp.* animals generally do not display evidence of IIS signaling defects. But  
405 the starvation resistance of *Arc1<sup>E8</sup>* animals suggests that *Arc1* mutants may be sensitized  
406 to reduced IIS signaling, which is exacerbated by GF rearing. Thus, *Acetobacter sp.* is  
407 largely sufficient to promote IIS activity in *Arc1* mutants, suggesting a potential  
408 mechanism by which *Acetobacter sp.* may promote organismal homeostasis in *Arc1*-  
409 deficient hosts.

## 410 **DISCUSSION**

411           Here we reveal a novel and unexpected connection between the host gene *Arc1*  
412 and the bacterial microbiota in *Drosophila*: we demonstrate that *Arc1* transcript levels are

413 responsive to the microbiota, and find that *Arc1* functions to suppress metabolic and  
414 fitness deficiencies induced by microbiota removal. *Arc1* exhibits microbiota-dependent  
415 expression, as its transcript levels are elevated or repressed in a tissue-specific manner  
416 in GF animals. Under our standard dietary conditions, GF rearing of wild type animals or  
417 *Arc1* mutation in GNO animals independently induced no defects or only moderate  
418 defects in host metabolism-related traits. However, when both the microbiota and *Arc1*  
419 were lost, strong IIS-dependent metabolic phenotypes emerged. In animals lacking *Arc1*,  
420 association with one specific *Acetobacter sp.* alone was sufficient to restore normal IIS  
421 signaling and developmental rate. Our data suggest that *Acetobacter sp.* functions in this  
422 capacity through multiple mechanisms, one of which involves dietary modification. Thus,  
423 in GF *Arc1* mutants, we propose that host genotype and microbial condition converge on  
424 the IIS pathway, leading to growth defects.

#### 425 Role of *Arc1* in insulin signaling in GF flies

426 We found that GF *Drosophila* lacking *Arc1* exhibit phenotypes consistent with  
427 reduced IIS activity. Connections between *Arc1/Arc* and IIS/insulin activity have been  
428 considered previously. *Arc* expression can be strongly induced in cultured human  
429 neuroblasts by treatment with exogenous insulin (Kremerskothen et al., 2002). *Arc1* is  
430 strongly expressed in one small cluster of large neurons in each lobe of both the larval  
431 brain and the pars cerebralis region of the adult brain that are proximal to and partially  
432 overlap with the insulin producing cells (IPCs; Mattaliano et al., 2007; Mosher et al., 2015).  
433 Further, Mattaliano et al. (2007) found that selectively restoring *Arc1* expression in the  
434 IPCs was sufficient to revert the starvation resistance of *Arc1* mutants. Yet beyond  
435 starvation resistance and the increased larval fat levels reported by Mosher et al. (2015),

436 loss of Arc1 resulted in no additional traits suggestive of reduced IIS signaling (Mattaliano  
437 et al., 2007). However, our data now reveal a microbiota-dependent component of the  
438 Arc1-IIS connection, as we primarily observed IIS-related phenotypes in *Arc1* mutants  
439 grown under GF conditions. Further, Arc1 metabolic phenotypes are strongly influenced  
440 by nutritional composition, as we found that the developmental rate of GF *Arc1<sup>E8</sup>* animals  
441 varied considerably on various dietary formulations.

442 The IIS pathway coordinates nutritional intake, metabolism, and growth in a  
443 mechanistically conserved manner between *Drosophila* and vertebrates. The *Drosophila*  
444 IIS pathway is functionally analogous to the combined roles of the mammalian insulin  
445 pathway, which primarily regulates blood glucose levels, and the Insulin-like growth factor  
446 (IGF) pathway, which coordinates organismal growth (Edgar, 2006). Our data suggest  
447 that Arc1 is a regulator of IIS signaling, whose role is revealed by GF rearing. In addition,  
448 Arc1 likely impacts metabolism- and growth-regulating cellular processes beyond IIS,  
449 which may or may not contribute to the growth delay of GF *Arc1<sup>E8</sup>* larvae. This is  
450 evidenced by the increased wing size and enhanced starvation resistance of *Arc1*  
451 mutants even in the presence of *Acetobacter sp.* (Figure 5D,E). Possible additional  
452 pathways influenced by Arc1 include Hippo signaling, which controls organ growth (Zhao  
453 et al., 2011), and ecdysone biosynthesis, which is nutrient responsive and regulates  
454 developmental rate (Edgar, 2006).

455 How might Arc1 promote IIS-pathway activity? Mammalian Arc modulates synaptic  
456 plasticity in part by enhancing the endocytosis, and consequently reducing the membrane  
457 availability, of AMPA receptors (Chowdhury et al., 2006; DaSilva et al., 2016; Wall and  
458 Corrêa, 2018). Although it has not been shown for Arc1, this molecular function suggests

459 that Arc proteins may have the ability to regulate the recycling of other receptors, like the  
460 insulin receptor. An alternative mechanism is suggested by recent reports that *Drosophila*  
461 Arc1 and mammalian Arc encode polypeptides that can self-assemble into mRNA-  
462 containing capsid-like structures, which are released from mammalian and *Drosophila*  
463 cell lines, and *Drosophila* neurons at the larval NMJ (neuromuscular junction) in  
464 extracellular vesicles (EVs; Ashley et al., 2018; Erlendsson et al., 2019; Pastuzyn et al.,  
465 2018). These Arc/Arc1 capsid-containing EVs are taken up by recipient cells in both  
466 cultured mouse hippocampal neurons and at the NMJ, constituting a novel mechanism of  
467 intercellular mRNA transfer (Ashley et al., 2018; Pastuzyn et al., 2018). The functional  
468 significance of this mechanism in cell types and tissues outside the NMJ that may be  
469 relevant here (e.g. IPC-adjacent neurons) has not been studied, but it is tempting to  
470 speculate that Arc1-mediated mRNA transfer may play a role in Arc1's metabolic function.  
471 Interestingly, Arc1 is broadly expressed; in addition to its expression in the brain  
472 (Mattaliano et al., 2007; Mosher et al., 2015), Arc1 is also expressed in the prothoracic  
473 gland (Mattaliano et al., 2007) and is transcriptionally enriched in the gut (FlyAtlas; Leader  
474 et al., 2018), where we and others have observed microbiota-dependent transcript level  
475 changes (Figure 1A; Bost et al., 2017; Dobson et al., 2016; Guo et al., 2014; Petkau et  
476 al., 2017). Additionally, knockdown of the transcription factor Seven-up, which reduces  
477 IIS activity, leads to strongly increased *Arc1* expression in the larval fat body (Musselman  
478 et al., 2018). This implicates Arc1 in multiple organs that control energy homeostasis. We  
479 predict that Arc1 capsid-dependent intercellular mRNA transport and/or endocytic based  
480 receptor cycling might act at multiple nodes in the systemic inter-organ signaling  
481 dynamics of IIS.

482 *Acetobacter sp.* support of *Arc1* mutant larval growth

483           While loss of *Arc1* significantly exacerbated the developmental delay of GF larvae,  
484 we found that monoassociation with *Acetobacter sp.* was sufficient for *Arc1* mutants to  
485 develop at the same rate as wild-type *Acetobacter sp.*-associated larvae (Figure 2B). The  
486 reduced growth rate of GF *Drosophila* is one of the most consistent and reproducible  
487 microbiota-dependent host traits documented in the literature. As such, the mechanistic  
488 basis underlying microbial growth promotion has been investigated (reviewed in Strigini  
489 and Leulier, 2016). Our study revealed both similarities and differences between  
490 published mechanisms of bacterial impact on larval growth, and the ways *Acetobacter*  
491 *sp.* promotes development in an *Arc1*-deficient host.

492           In laboratory *Drosophila* cultures, bacterial populations predominantly grow on the  
493 diet substrate, and are ingested along with the food (Ludington and Ja, 2020). We found  
494 that pre-conditioning the larval diet with *Acetobacter sp.* substantially accelerated GF  
495 *Arc1* mutant development, suggesting that an interaction between *Acetobacter sp.* and  
496 the larval diet is a key feature of this bacterial isolate's growth promoting activity (Figure  
497 4D'). There is precedent for bacterial modification of the diet altering host metabolism and  
498 growth in *Drosophila*. On nutritionally rich diets, *Acetobacter tropicalis* can prevent  
499 excessive accumulation of triglycerides in adult flies by metabolizing glucose in the food  
500 and reducing its availability to the host (Huang and Douglas, 2015). On nutritionally poor  
501 diets, *L. plantarum* depletes the levels of sugars and branched-chain amino acids, and  
502 increase the levels of glycolysis and fermentation products to promote larval growth  
503 (Storelli et al., 2017). Because acetic acid bacteria frequently predominate the *Drosophila*  
504 microbiota, the impacts of acetic acid on fly physiology and development have been

505 investigated (Kamareddine et al., 2018; Kim et al., 2017; Shin et al., 2011). As in Kim et  
506 al. (2017), we found that acetic acid either increased or had no effect on the  
507 developmental delay of wild-type or *Arc1* mutant larvae (Figure 4C,C'), suggesting acetic  
508 acid production by our *Acetobacter sp.* isolate likely has a minimal impact on *Arc1* mutant  
509 development under our dietary conditions.

510       Importantly, our data reveal that association with a live population of *Acetobacter*  
511 *sp.* is required for optimal growth rate promotion of *Arc1* mutants. This suggests that  
512 additional mechanisms beyond dietary modification support larval development in the  
513 absence of *Arc1*. In wild-type flies, commensal bacteria have been shown to promote  
514 growth through mechanisms involving interactions between bacterial cell wall  
515 components and gut cells. For example, D-alanylated teichoic acids in the *L. plantarum*  
516 cell wall induce expression of intestinal peptidases, facilitating larval growth on protein-  
517 poor diets (Consuegra et al., 2020; Matos et al., 2017). Further, the microbiota-responsive  
518 immune deficiency (IMD) pathway, which is activated in enterocytes by DAP-type  
519 peptidoglycan present in gram-negative and *Lactobacilli* cell walls, has been shown to  
520 promote metabolic homeostasis and larval development (Davoodi et al., 2018;  
521 Kamareddine et al., 2018).

522       Taken together, our data suggest that the full impact of live *Acetobacter sp.* on  
523 *Arc1* mutant metabolism and development involves a combinatorial effect of dietary  
524 modification and direct bacterial-host cell interactions. These two distinct modes of  
525 microbiota activity are analogous to the modes by which the microbiota influence host  
526 physiology in mammals. Bacterial breakdown of certain macro-nutrients (e.g. complex  
527 polysaccharides) in the human gut has been linked to health and disease states

528 (Cockburn and Koropatkin, 2016). In contrast, other functions, such as immune cell  
529 maturation and maintenance of gut epithelial architecture, appear to require bacterial cell-  
530 derived antigens (Sekirov et al., 2010).

531

### 532 Proposed evolutionary conservation of Arc-microbiota-insulin connections

533 Our data raise the question of whether microbiota- and diet-responsive metabolism  
534 regulation is a conserved function for Arc proteins. It has been shown that chronically  
535 feeding mice a high fat diet (HFD), which induces insulin resistance and diabetic-like  
536 phenotypes as well as cognitive impairments, leads to suppressed Arc expression in the  
537 cerebral cortex and hippocampus (Chen et al., 2020; Mateos et al., 2009). Comparably,  
538 flies reared on a HFD exhibited reduced memory formation and reduced Arc1 expression  
539 in the head ( $p < 0.05$ , 1.35 fold-change reduction; Rivera et al., 2019). In rodent models, it  
540 is well established that HFD perturbs the composition of the gut microbiota in a manner  
541 that can mediate diabetic and other disease phenotypes (Kim et al., 2012; Murphy et al.,  
542 2015). Our data thus raise the intriguing and previously unconsidered possibility that Arc  
543 function in the brain plays a role linking diet-induced gut dysbiosis to cognitive and  
544 metabolic impairments.

## 545 **MATERIALS AND METHODS**

### 546 ***Drosophila* stocks and general rearing**

547 The following fly stocks were used in this study:  $w^{1118}$ , Canton-S, and Oregon-R are long-  
548 term lab stocks originally from the Bloomington Drosophila Stock Center (BDSC), Top  
549 Banana (kind gift from Dr. Michael Dickinson),  $y[1] w[1]$  (BDSC #1495),  $w^{1118}; Arc1^{E8}$  (kind  
550 gift from Dr. Vivian Budnik and Dr. Travis Thomson),  $w[*]; Arc1^{esm113}$  (BDSC #37531),



551  $w[*]; Arc1^{esm18}$  (BDSC #37530),  $w[*]; P\{w[+mC]=Arc1-GAL4.M\}3$  (BDSC #37533),  $w^{1118};$   
552  $P\{UAS-rpr.C\}14$  (BDSC #5824),  $y[1]w[67c23];$   
553  $P\{w[+mC]y[+mDint2]=EPgy2\}Arc2[EY21260]$  (BDSC #22466),  $w^{118}; P\{tGPH\}4$  (BDSC  
554 #8164). Non-experimental fly stocks were maintained at 21-22°C. Our laboratory utilizes  
555 a yeast-cornmeal-molasses diet of the following recipe (percentages are given as wt/vol  
556 or vol/vol throughout Methods): 8.5% molasses (Domino Foods), 7% cornmeal (Prairie  
557 Mills Products), 1.1% active dry yeast (Genesee Scientific), 0.86% gelidium agar  
558 (MoorAgar). The diet is boiled for ~30-45 minutes, cooled to 60-65°C, supplemented with  
559 0.27% propionic acid (Sigma) and 0.27% methylparaben (Sigma) and dispensed to  
560 polypropylene vials. All experiments in this study utilized this diet formulation except those  
561 presented in Figure 2, which were conducted on yeast-glucose diets. Yeast-glucose diets  
562 consisted of the indicated proportions of active dry yeast (Genesee Scientific), dextrose  
563 (Fisher Scientific), and gelidium agar (MoorAgar), and were prepared as described in  
564 (Koyle et al., 2016). Diets were mixed, autoclaved, cooled to 60-65°C, supplemented with  
565 propionic acid and methylparaben, and dispensed to autoclaved vials.

## 566 **Bacterial stocks**

567 The *Acetobacter* sp., *Acetobacter pasteurianus*, *Lactobacillus plantarum*, and  
568 *Lactobacillus brevis* stocks utilized in this study were all isolated from conventionally  
569 reared Top Banana *Drosophila* cultures in our laboratory. Adult flies were surface  
570 sterilized in 10% sodium hypochlorite and 70% ethanol, rinsed three times and  
571 homogenized in phosphate buffered saline (PBS). Serial dilutions of fly homogenates  
572 were plated on de Man, Rogosa, and Sharpe (MRS; Weber Scientific) and acetic acid-  
573 ethanol (AE; 0.8% yeast extract, 1.5% peptone, 1% dextrose, 0.5% ethanol, 0.3% acetic

574 acid; Blum et al., 2013) agar plates. Colonies with distinct morphology were streaked for  
575 isolation. Bacterial taxonomies were assigned by PCR amplification and sequencing of  
576 the 16S rRNA gene using universal bacterial primers 8F (5'-  
577 AGAGTTTGATCTGGCTCAG-3') and 1492R (5'-GGMTACCTTGTTACGACTT-3'; Eden  
578 et al., 1991). Sequences were searched against the NCBI nr/nt database via blastn  
579 (Altschul et al., 1990; Camacho et al., 2009; Morgulis et al., 2008) and taxonomies were  
580 assigned based on >97% sequence homology. The 16S rRNA sequence for isolate A22  
581 (*Acetobacter* sp.) bore >97% similarity with >five different *Acetobacter* species so we do  
582 not assign a species-level taxonomic classification in this report.

### 583 **Generation of germ free and gnotobiotic fly cultures**

584 Germ free and gnotobiotic *Drosophila* cultures were generated according to established  
585 methods (Koyle et al., 2016). Synchronous populations of embryos were collected on  
586 apple juice agar plates. In a sterile biosafety cabinet, embryos were treated with 50%  
587 sodium hypochlorite solution for two minutes to eliminate exogenous microbes and  
588 remove the chorion. Embryos were then rinsed twice in 70% ethanol, twice in sterilized  
589 milliQ water, and once in sterilized embryo wash (2% Triton X-100, 7% NaCl). Sterilized  
590 embryos were then pipetted into autoclaved food vials to generate germ free cultures. To  
591 generate gnotobiotic flies, overnight cultures of bacterial isolates were grown in MRS  
592 broth (30°C with shaking for *Acetobacter* isolates and 37°C static for *Lactobacilli*). Sterile  
593 food vials were inoculated with 40µL of overnight cultures (OD~1) immediately prior to  
594 the addition of sterilized fly embryos. For polyassociated (GNO) flies, vials were  
595 inoculated with 40µL of a 1:1:1:1 mixture of overnight cultures of the four indicated  
596 bacteria.

597 All experimental *Drosophila* cultures were maintained in an insect incubator at 23°C, 70%  
598 humidity, on a 12:12 light-dark cycle.

599 Larval and adult animals were confirmed as germ free or mono-/polyassociated by  
600 homogenization in sterile PBS and plating on MRS and AE agar plates.

601 We did not maintain GF, GNO, or monoassociated flies over multiple generations; all  
602 experiments utilized independently-derived germ free or gnotobiotic animals.

### 603 **Developmental timing measurements**

604 Synchronous populations of embryos were collected in a six-hour time window and  
605 treated as described above to generate vials of defined microbial conditions. For  
606 pupariation and eclosion rate analysis, the number of pupae formed or empty pupal  
607 cases, respectively, were counted daily until 100% of the population had pupariated or  
608 eclosed. The duration of larval development is strongly affected by crowding conditions  
609 in the food (Klepsatel et al., 2018). Also, variable and unpredictable numbers of embryos  
610 do not survive the bleach and ethanol washes employed to generate germ free and  
611 gnotobiotic cultures (Koyle et al., 2016; Troha and Buchon, 2019; unpublished  
612 observations). Therefore, vials containing fewer than ten and greater than forty animals  
613 were omitted from analyses as either under- or over-crowded, respectively.

614 Larval instars were determined via mouth hook and/or posterior spiracle morphologies  
615 (Oldroyd, 1951).

616 Larval length and pupal volume were measured from images using Fiji (Schindelin et al.,  
617 2012). For pupal volume, length (l) and width (w) of each pupa were measured and  
618 volume calculated as previously described (Layalle et al., 2008; Redhai et al., 2020):  
619  $V=4/3\pi(l/2)(w/2)^2$ .

## 620 **Larval feeding assays**

621 Larval feeding was assessed via dye consumption (Buhler et al., 2018; Libert et al., 2007;  
622 Mosher et al., 2015; Shin et al., 2011). Stage-matched pre-wandering third instar larvae  
623 were transferred to autoclaved fly food containing 1.8% FD&C Red #40 dye (Ward's  
624 Science,) and allowed to feed for 3 hr at 23°C. Guts were then dissected from 20 larvae  
625 in PBS and homogenized via bead beating in 1mL PBS. Homogenates were centrifuged  
626 at 13,000 rpm for 1 minute to pellet debris and absorbance of the supernatant was  
627 measured at 490nm with a Tecan Spark microplate reader. Weighed amounts of dyed  
628 food were similarly homogenized in PBS and  $A_{490}$  readings collected to generate a  
629 standard curve, which was used to calculate  $\mu\text{g}$  food consumed per larva.

630 Mouth hook contraction rates were assayed as described (Bhatt and Neckameyer, 2013).  
631 Pre-wandering third instar larvae were transferred to apple juice plates coated with yeast  
632 paste, given 30 seconds to acclimate, and contractions were counted manually for 30  
633 seconds.

## 634 **Quantifying bacterial loads for monoassociated larvae**

635 Pre-wandering third instar larvae (8-10 animals per replicate) were removed from the food  
636 and surface sterilized in 10% sodium hypochlorite for 1 minute. Larvae were then rinsed  
637 three times in PBS and homogenized in 125 $\mu\text{L}$  PBS via bead beating for 30 seconds.  
638 Homogenates were serially diluted in PBS and dilutions were plated on AE (for  
639 *Acetobacter*) or MRS (for *Lactobacilli*) agar plates. Plates were incubated for 2-3 days at  
640 either 30°C (AE) or 37°C (MRS), and resultant colonies were counted manually from  
641 dilution plates bearing ~50-400 colonies. Bacterial loads were calculated as colony-

642 forming units (CFUs) per larva, as previously described (Koyle et al., 2016), and log  
643 transformed for analysis.

#### 644 **Dietary treatments**

##### 645 *Acetobacter sp.*-conditioned diet

646 To generate *Acetobacter sp.*-conditioned fly food (Figure 4), autoclaved food vials were  
647 inoculated with *Acetobacter sp.* overnight culture, as described above. Inoculated vials  
648 were incubated for five days at 23°C. Vials were then incubated at 65°C for 3 hr to kill  
649 bacteria. Sterility of the conditioned diet was confirmed by plating food and larval  
650 homogenates on AE plates, which consistently yielded no bacterial growth. Heated diet  
651 controls consisted of un-inoculated, autoclaved GF vials incubated at 65°C for 3 hr.

##### 652 Heat-killed bacterial feeding

653 For experiments feeding GF larvae dead bacterial cells (Figure 4A), overnight cultures of  
654 *Acetobacter sp.* were heat-killed at 65°C for 1 hr and autoclaved food vials were  
655 inoculated with 40µL of heat-killed suspension prior to the addition of GF embryos. Vials  
656 were further inoculated with 40µL heat-killed bacterial suspension daily until 100% of the  
657 population had pupariated. Successful heat killing was confirmed for each daily inoculum  
658 by plating undiluted heat-treated bacterial suspension on AE plates, and by plating larval  
659 homogenates, which consistently yielded no bacterial growth.

##### 660 Cell-free supernatant feeding

661 For *Acetobacter sp.* supernatant treatments (Figure 4B), overnight cultures of  
662 *Acetobacter sp.* (3mL in MRS, grown as described above) were filtered twice through  
663 0.22µm PVDF sterile membrane filters (Genesee Scientific). Autoclaved food vials were  
664 inoculated with 40µL of filtered media immediately prior to addition of GF embryos, and

665 vials were further inoculated with 40 $\mu$ L of filtered media daily until 100% of the population  
666 pupariated. Absence of live bacterial cells was confirmed by plating daily filtered media  
667 on AE plates, and plating larval homogenates.

#### 668 Acetic acid-supplemented diets

669 For acetic acid supplementation of GF larval fly cultures (Figure 4C, C'), fly food was  
670 autoclaved and allowed to cool to ~50-60°C. Glacial acetic acid (Fisher Scientific) was  
671 then added to defined volumes of food to the indicated final concentrations (vol/vol 0.1%  
672 and 0.2%). For sodium acetate supplementation, solid sodium acetate (Sigma) was  
673 added to autoclaved, cooled food to a final concentration of 50mM. Supplemented diets  
674 were mixed thoroughly and dispensed to pre-autoclaved empty vials.

#### 675 **Wing analysis**

676 Wings from adult females were dissected, mounted in Aqua-mount (Thermo Scientific),  
677 and imaged with a QICAM-IR Fast 1394 camera (Q-Imaging) on a Zeiss Axioskop2 Plus  
678 microscope. All measurements were collected using Fiji. Wing area was measured along  
679 wing margin, excluding the hinge. For cell size analysis, trichome density was measured  
680 with FijiWings2.3 software using the 150px trichome density feature (Dobens and  
681 Dobens, 2013). Cell count per wing was determined by multiplying the cell density  
682 measurement by the total area of the wing.

#### 683 **Starvation resistance**

684 Five days post-eclosion, adult mated female flies were transferred to 1% agar-water vials,  
685 8-10 flies per vial. Flies were transferred to fresh agar-water vials daily. Survival was  
686 monitored daily until 100% of the population succumbed. The experiment was conducted

687 three times, ~50-120 animals per condition per replicate, and data were combined for  
688 analysis.

### 689 **RT-qPCR**

690 Heads and guts (proventriculus to hindgut, excluding crop and malpighian tubules) from  
691 5-7 days-post-eclosion adult male flies (8-10 animals per replicate) were dissected in ice  
692 cold PBS and homogenized immediately in Trizol reagent (Thermo Fisher). RNA was  
693 extracted using the Direct-zol RNA Miniprep kit (Zymo Research) exactly following the  
694 manufacturer's protocol. High quality RNA ( $A_{260nm/280nm} \sim 2$ ; 500ng) was used as template  
695 for cDNA synthesis using the qScript cDNA synthesis kit (QuantaBio). Product from cDNA  
696 synthesis reactions was used for qPCR with the PerfeCTa SYBR Green Supermix  
697 (QuantaBio) in an Applied Biosystems 7300 Real Time PCR System instrument. Data  
698 were normalized to *Rp/32* and expression fold changes were calculated using the  $2^{-\Delta\Delta Ct}$   
699 method. Primers used in this study: *Rp/32* (5'- ATGCTAAGCTGTCGCACAAATG-3' and  
700 5'- GTTCGATCCGTAACCGATGT-3'; Ponton et al., 2011), *Arc1* (5'-  
701 CATCATCGAGCACAACAACC-3' and 5'-CTACTCCTCGTGCTGCTCCT-3'; Mosher et  
702 al., 2015), *Arc2* (5'-CGTGGAGACGTATAAAGAGGTGG-3' and 5'-  
703 GACCAGGTCTTGGCATCCC-3'; FlyPrimerBank (Hu et al., 2013)).

### 704 **Fluorescence imaging**

705 Fat bodies from pre-wandering third instar larvae were dissected in ice cold PBS and  
706 fixed in 4% paraformaldehyde-PBS (Electron Microscopy Sciences) for 30 min at room  
707 temperature. Fat bodies were rinsed three times in PBS and mounted in aqua-poly/mount  
708 (Polysciences). Images were captured on a spinning disc microscope with a Celesta 1W  
709 light engine (Lumencor), an X-Light V2 scan head (Crest Optics), and a Prime95B CMOS

710 camera (Photometrics) on a Zeiss Axiovert 200M using Metamorph software (Molecular  
711 Devices).

## 712 **Statistical analysis**

713 Statistical tests were conducted and figures generated using R version 3.5.1 (R Core  
714 Team, 2019). For development data, the average time to pupariation was calculated for  
715 each vial from the number of individuals pupariating on each day until the entire  
716 population completed larval development. These per-vial values from at minimum three  
717 replicates were used for statistical analyses; full sample sizes and statistical test output  
718 for all development experiments in this study are reported in Table S1. Throughout,  
719 within-genotype comparisons among different treatments were conducted via one-way  
720 analysis-of-variance (ANOVA), while comparisons among different genotypes and  
721 treatments were conducted via two-way ANOVA, as indicated in the figure legends. Post-  
722 hoc analysis among significantly different factors were conducted via Tukey test using the  
723 “lsmeans” package (Lenth, 2016). RT-qPCR data were analyzed via Student’s t-test.  
724 Starvation survival data were compared via Cox proportional-hazards model analysis  
725 using the “survival” package (Therneau, 2012). The threshold of statistical significance  
726 was considered  $p < 0.05$ .

727

## 728 **ACKNOWLEDGMENTS**

729 We thank members of the McCartney, Hiller, and Mitchell labs for helpful discussions  
730 during the performance of the study. We thank Rory Eutsey (Hiller lab, Carnegie Mellon  
731 University) for technical assistance with qPCR experiments. We would like to thank Dr.  
732 John Woolford for providing feedback on the manuscript. The Top Banana fly stock was



733 a generous gift from Dr. Michael Dickinson's lab (CalTech). The *Arc1<sup>E8</sup>* fly stock was a  
734 generous gift from Dr. Vivian Budnik and Dr. Travis Thomson (University of  
735 Massachusetts Medical School). We thank Bloomington Drosophila Stock Center for  
736 providing other fly stocks. We would like to thank the Woolford, Mitchell, and Hinman labs  
737 and the Molecular Biosensor and Imaging Center at Carnegie Mellon University for  
738 reagents and equipment.

739 Funding for this work was provided by a Charles E. Kaufman Foundation New Initiative  
740 Grant and a Carnegie Mellon University ProSEED/BrainHub seed grant to B.M.M.

741 S.A.K. was supported by NSF Graduate Research Fellowship DGE 1252522 and DGE  
742 1745016.

743 No competing interests declared.

#### 744 REFERENCES

- 745 **Alhowikan, A. M.** (2016). Activity-Regulated Cytoskeleton-Associated Protein  
746 Dysfunction May Contribute to Memory Disorder and Earlier Detection of Autism  
747 Spectrum Disorders. *Med. Princ. Pract.* **25**, 350-354.
- 748 **Altschul, S. F., Gish, W., Miller, W., Myers, E. W. and Lipman, D. J.** (1990). Basic  
749 local alignment search tool. *J. Mol. Biol.* **215**, 403–10.
- 750 **Ashley, J., Cordy, B., Lucia, D., Fradkin, L. G., Budnik, V. and Thomson, T.** (2018).  
751 Retrovirus-like Gag Protein Arc1 Binds RNA and Traffics across Synaptic Boutons.  
752 *Cell* **172**, 262-274.e11.
- 753 **Baker, K. D. and Thummel, C. S.** (2007). Diabetic Larvae and Obese Flies-Emerging  
754 Studies of Metabolism in Drosophila. *Cell Metab.* **6**, 257–266.
- 755 **Bhatt, P. K. and Neckameyer, W. S.** (2013). Functional analysis of the larval feeding  
756 circuit in Drosophila. *J. Vis. Exp.* **81**, e51062.
- 757 **Bi, R., Kong, L. L., Xu, M., Li, G. D., Zhang, D. F., Li, T., Fang, Y., Zhang, C., Zhang,  
758 B. and Yao, Y. G.** (2018). The Arc Gene Confers Genetic Susceptibility to  
759 Alzheimer's Disease in Han Chinese. *Mol. Neurobiol.* **55** 1217-1226.
- 760 **Bing, X. L., Gerlach, J., Loeb, G. and Buchon, N.** (2018). Nutrient-dependent impact  
761 of microbes on Drosophila *suzukii* development. *MBio* **9**, e02199-17.
- 762 **Blum, J. E., Fischer, C. N., Miles, J. and Handelsman, J.** (2013). Frequent  
763 Replenishment Sustains the Beneficial Microbiome of Drosophila *melanogaster*.  
764 *MBio* **4**, e00860-13.
- 765 **Bost, A., Franzenburg, S., Adair, K. L., Martinson, V. G., Loeb, G. and Douglas, A.  
766 E.** (2017). How gut transcriptional function of *Drosophila melanogaster* varies with

- 767 the presence and composition of the gut microbiota. *Mol. Ecol.* **27**, 1848-1859.
- 768 **Britton, J. S., Lockwood, W. K., Li, L., Cohen, S. M. and Edgar, B. A.** (2002).
- 769 *Drosophila* 's Insulin / PI3-Kinase Pathway Coordinates Cellular Metabolism with
- 770 Nutritional Conditions. *Dev Cell* **2**, 239–249.
- 771 **Broderick, N. A. and Lemaitre, B.** (2012). Gut-associated microbes of *Drosophila*
- 772 *melanogaster*. *Gut Microbes* **3**, 307–321.
- 773 **Brogiolo, W., Stocker, H., Ikeya, T., Rintelen, F., Fernandez, R. and Hafen, E.**
- 774 (2001). An evolutionarily conserved function of the *Drosophila* insulin receptor and
- 775 insulin-like peptides in growth control. *Curr Biol* **11**, 213–221.
- 776 **Broughton, S. J., Piper, M. D. W., Ikeya, T., Bass, T. M., Jacobson, J., Driege, Y.,**
- 777 **Martinez, P., Hafen, E., Withers, D. J., Leever, S. J., et al.** (2005). Longer
- 778 lifespan, altered metabolism, and stress resistance in *Drosophila* from ablation of
- 779 cells making insulin-like ligands. *Proc Natl Acad Sci U S A* **102**, 3105–3110.
- 780 **Buhler, K., Clements, J., Winant, M., Bolckmans, L., Vulsteke, V. and Callaerts, P.**
- 781 (2018). Growth control through regulation of insulin signalling by nutrition-activated
- 782 steroid hormone in *Drosophila*. *Dev.* **145**, dev165654.
- 783 **Camacho, C., Coulouris, G., Avagyan, V., Ma, N., Papadopoulos, J., Bealer, K. and**
- 784 **Madden, T. L.** (2009). BLAST+: Architecture and applications. *BMC Bioinformatics*
- 785 **10**, 421.
- 786 **Campillos, M., Doerks, T., Shah, P. K. and Bork, P.** (2006). Computational
- 787 characterization of multiple Gag-like human proteins. *Trends Genet.* **22**, 585-589.
- 788 **Carmichael, R. E. and Henley, J. M.** (2018). Transcriptional and post-translational
- 789 regulation of Arc in synaptic plasticity. *Semin. Cell Dev. Biol.* **77**, 3-9.
- 790 **Chaston, J., Newell, P. and Douglas, A.** (2014). Metagenome-wide association of
- 791 microbial determinants of host phenotype in *Drosophila melanogaster*. *MBio* **5**,
- 792 e01631-14.
- 793 **Chen, T. J., Chen, S. S., Wang, D. C. and Hung, H. S.** (2020). High-fat diet reduces
- 794 novelty-induced expression of activity-regulated cytoskeleton-associated protein. *J.*
- 795 *Cell. Physiol.* **235**, 1065–1075.
- 796 **Chowdhury, S., Shepherd, J. D., Okuno, H., Lyford, G., Petralia, R. S., Plath, N.,**
- 797 **Kuhl, D., Hagan, R. L. and Worley, P. F.** (2006). Arc/Arg3.1 Interacts with the
- 798 Endocytic Machinery to Regulate AMPA Receptor Trafficking. *Neuron.* **52**, 445-459.
- 799 **Cockburn, D. W. and Koropatkin, N. M.** (2016). Polysaccharide Degradation by the
- 800 Intestinal Microbiota and Its Influence on Human Health and Disease. *J. Mol. Biol.*
- 801 **428**, 3230–3252.
- 802 **Colombani, J., Raisin, S., Pantalacci, S., Radimerski, T., Montagne, J. and**
- 803 **Léopold, P.** (2003). A nutrient sensor mechanism controls *Drosophila* growth. *Cell.*
- 804 **114**, 739-749.
- 805 **Consuegra, J., Grenier, T., Baa-Puyoulet, P., Rahioui, I., Akherraz, H., Gervais, H.,**
- 806 **Parisot, N., Da Silva, P., Charles, H., Calevro, F., et al.** (2020). *Drosophila*-
- 807 associated bacteria differentially shape the nutritional requirements of their host
- 808 during juvenile growth. *PLoS Biol.* **18**, e3000681.
- 809 **Cottee, M. A., Letham, S. C., Young, G. R., Stoye, J. P. and Taylor, I. A.** (2019).
- 810 Structure of *D. melanogaster* ARC1 reveals a repurposed molecule with
- 811 characteristics of retroviral Gag. *Sci Adv* **6**, eaay6354.
- 812 **DaSilva, L. L. P., Wall, M. J., de Almeida, L. P., Wauters, S. C., Januário, Y. C.,**

- 813 **Müller, J. and Corrêa, S. A. L.** (2016). Activity-regulated cytoskeleton-associated  
814 protein controls AMPAR endocytosis through a direct interaction with clathrin-  
815 adaptor protein 2. *eNeuro*. **3**, ENEURO.0144-15.2016.
- 816 **Davoodi, S., Galenza, A., Panteluk, A., Deshpande, R., Ferguson, M., Grewal, S.**  
817 **and Foley, E.** (2018). The Immune Deficiency Pathway Regulates Metabolic  
818 Homeostasis in *Drosophila*. *J Immunol*. **202**, 2747-2759.
- 819 **DiAngelo, J. R. and Birnbaum, M. J.** (2009). Regulation of Fat Cell Mass by Insulin in  
820 *Drosophila melanogaster*. *Mol. Cell. Biol*. **29**, 6341-6352.
- 821 **Dobens, A. C. and Dobens, L. L.** (2013). Fijiwings: An open source toolkit for  
822 semiautomated morphometric analysis of insect wings. *G3 Genes, Genomes,*  
823 *Genet*. **3**, 1443-1449.
- 824 **Dobson, A. J., Chaston, J. M. and Douglas, A. E.** (2016). The *Drosophila*  
825 transcriptional network is structured by microbiota. *BMC Genomics* **17**, 975.
- 826 **Douglas, A. E.** (2018). The *Drosophila* model for microbiome research. *Lab Anim. (NY)*.  
827 **47**, 157–164.
- 828 **Eden, P. A. E., Schmidt, T. M., Blakemore, R. P. and Pace, N. R.** (1991).  
829 Phylogenetic analysis of *Aquaspirillum magnetotacticum* using polymerase chain  
830 reaction-amplified 16S rRNA-specific DNA. *Int. J. Syst. Bacteriol*. **41**, 324–325.
- 831 **Edgar, B. A.** (2006). How flies get their size: genetics meets physiology. *Nat rev Genet*.  
832 **7**, 907–916.
- 833 **Ekmekciu, I., von Klitzing, E., Fiebiger, U., Escher, U., Neumann, C., Bacher, P.,**  
834 **Scheffold, A., Kühl, A. A., Bereswill, S. and Heimesaat, M. M.** (2017). Immune  
835 responses to broad-spectrum antibiotic treatment and fecal microbiota  
836 transplantation in mice. *Front. Immunol*. **8**, 397.
- 837 **Erkosar, B., Storelli, G., Mitchell, M., Bozonnet, L., Bozonnet, N. and Leulier, F.**  
838 (2015). Pathogen Virulence Impedes Mutualist-Mediated Enhancement of Host  
839 Juvenile Growth via Inhibition of Protein Digestion. *Cell Host Microbe* **18**, 445–455.
- 840 **Erkosar, B., Kolly, S., van der Meer, J. R. and Kawecki, T. J.** (2017). Adaptation to  
841 Chronic Nutritional Stress Leads to Reduced Dependence on Microbiota in  
842 *Drosophila melanogaster*. *MBio* **8**, e01496-17.
- 843 **Erlendsson, S., Morado, D. R., Shepherd, J. D. and Briggs, J. A. G.** (2019).  
844 Structures of virus-like capsids formed by the *drosophila* neuronal Arc proteins. *Nat*  
845 *Neurosci*. **23**, 172-175.
- 846 **Fromer, M., Pocklington, A. J., Kavanagh, D. H., Williams, H. J., Dwyer, S.,**  
847 **Gormley, P., Georgieva, L., Rees, E., Palta, P., Ruderfer, D. M., et al.** (2014). De  
848 novo mutations in schizophrenia implicate synaptic networks. *Nature*. **506**, 179-  
849 184.
- 850 **Géminard, C., Rulifson, E. J. and Léopold, P.** (2009). Remote Control of Insulin  
851 Secretion by Fat Cells in *Drosophila*. *Cell Metab*. **10**, 199–207.
- 852 **Gilbert, L. I.** (2008). *Drosophila* is an inclusive model for human diseases, growth and  
853 development. *Mol. Cell. Endocrinol*. **293**, 25-31.
- 854 **Gilbert, J. A., Krajmalnik-Brown, R., Porazinska, D. L., Weiss, S. J. and Knight, R.**  
855 (2013). Toward Effective Probiotics for Autism and Other Neurodevelopmental  
856 Disorders. *Cell* **155**, 1446–1448.
- 857 **Guan, Z., Saraswati, S., Adolfsen, B. and Littleton, J. T.** (2005). Genome-wide  
858 transcriptional changes associated with enhanced activity in the *Drosophila*

- 859 nervous system. *Neuron*. **48**, 91-107.
- 860 **Guo, L., Karpac, J., Tran, S. L. and Jasper, H.** (2014). PGRP-SC2 promotes gut  
861 immune homeostasis to limit commensal dysbiosis and extend lifespan. *Cell* **156**,  
862 109–122.
- 863 **Guzowski, J. F., McNaughton, B. L., Barnes, C. A. and Worley, P. F.** (1999).  
864 Environment-specific expression of the immediate-early gene Arc in hippocampal  
865 neuronal ensembles. *Nat. Neurosci.* **2**, 1120-1124.
- 866 **Guzowski, J. F., Lyford, G. L., Stevenson, G. D., Houston, F. P., McGaugh, J. L.,**  
867 **Worley, P. F. and Barnes, C. A.** (2000). Inhibition of activity-dependent arc protein  
868 expression in the rat hippocampus impairs the maintenance of long-term  
869 potentiation and the consolidation of long-term memory. *J. Neurosci.* **20**, 3993-  
870 4001.
- 871 **Hayes, C. L., Dong, J., Galipeau, H. J., Jury, J., McCarville, J., Huang, X., Wang, X.**  
872 **Y., Naidoo, A., Anbazhagan, A. N., Libertucci, J., et al.** (2018). Commensal  
873 microbiota induces colonic barrier structure and functions that contribute to  
874 homeostasis. *Sci. Rep.* **8**, 14184.
- 875 **Hu, Y., Sopko, R., Foos, M., Kelley, C., Flockhart, I., Ammeux, N., Wang, X.,**  
876 **Perkins, L., Perrimon, N. and Mohr, S. E.** (2013). FlyPrimerBank: an online  
877 database for *Drosophila melanogaster* gene expression analysis and knockdown  
878 evaluation of RNAi reagents. *G3 (Bethesda)*. **3**, 1607-1616.
- 879 **Huang, J.-H. and Douglas, A. E.** (2015). Consumption of dietary sugar by gut bacteria  
880 determines *Drosophila* lipid content. *Biol. Lett.* **11**, 20150469.
- 881 **Jünger, M. A., Rintelen, F., Stocker, H., Wasserman, J. D., Végh, M., Radimerski,**  
882 **T., Greenberg, M. E. and Hafen, E.** (2003). The *Drosophila* Forkhead transcription  
883 factor FOXO mediates the reduction in cell number associated with reduced insulin  
884 signaling. *J. Biol.* **2**, 20.
- 885 **Kamareddine, L., Robins, W. P., Berkey, C. D., Mekalanos, J. J. and Watnick, P. I.**  
886 (2018). The *Drosophila* Immune Deficiency Pathway Modulates Enteroendocrine  
887 Function and Host Metabolism. *Cell Metab.* **28**, 449-462.e5.
- 888 **Keebaugh, E. S., Yamada, R., Obadia, B., Ludington, W. B. and Ja, W. W.** (2018).  
889 Microbial Quantity Impacts *Drosophila* Nutrition, Development, and Lifespan.  
890 *iScience*. **4**, 247-259.
- 891 **Keith, S. A., Eutsey, R., Lee, H., Solomon, B., Oliver, S., Kingsford, C., Hiller, N. L.**  
892 **and McCartney, B. M.** (2019). Identification of Microbiota-Induced Gene  
893 Expression Changes in the *Drosophila melanogaster* Head. *bioRxiv*.
- 894 **Kim, K. A., Gu, W., Lee, I. A., Joh, E. H. and Kim, D. H.** (2012). High Fat Diet-Induced  
895 Gut Microbiota Exacerbates Inflammation and Obesity in Mice via the TLR4  
896 Signaling Pathway. *PLoS One*. **7**, e47713.
- 897 **Kim, G., Huang, J. H., McMullen, J. G., Newell, P. D. and Douglas, A. E.** (2017).  
898 Physiological responses of insects to microbial fermentation products: insights from  
899 the interactions between *Drosophila* and acetic acid. *J. Insect Physiol.* **106**, 13-19.
- 900 **Klepsatel, P., Procházka, E. and Gálíková, M.** (2018). Crowding of *Drosophila* larvae  
901 affects lifespan and other life-history traits via reduced availability of dietary yeast.  
902 *Exp. Gerontol.* **110**, 298-308.
- 903 **Koyle, M. L., Veloz, M., Judd, A. M., Wong, A. C.-N., Newell, P. D., Douglas, A. E.**  
904 **and Chaston, J. M.** (2016). Rearing the Fruit Fly *Drosophila melanogaster* Under

- 905 Axenic and Gnotobiotic Conditions. *J. Vis. Exp.* **113**, 54219.
- 906 **Kramer, J. M., Davidge, J. T., Lockyer, J. M. and Staveley, B. E.** (2003). Expression  
907 of Drosophila FOXO regulates growth and can phenocopy starvation. *BMC Dev.*  
908 *Biol.* **3**, 5.
- 909 **Kremerskothen, J., Wendholt, D., Teber, I. and Barnekow, A.** (2002). Insulin-induced  
910 expression of the activity-regulated cytoskeleton-associated gene (ARC) in human  
911 neuroblastoma cells requires p21ras, mitogen-activated protein kinase/extracellular  
912 regulated kinase and src tyrosine kinases but is protein kinase C-independ.  
913 *Neurosci. Lett.* **321**, 153–156.
- 914 **Larsen, N., Vogensen, F. K., Van Den Berg, F. W. J., Nielsen, D. S., Andreasen, A.**  
915 **S., Pedersen, B. K., Al-Soud, W. A., Sørensen, S. J., Hansen, L. H. and**  
916 **Jakobsen, M.** (2010). Gut microbiota in human adults with type 2 diabetes differs  
917 from non-diabetic adults. *PLoS One* **5**, e9085.
- 918 **Layalle, S., Arquier, N. and Léopold, P.** (2008). The TOR Pathway Couples Nutrition  
919 and Developmental Timing in Drosophila. *Dev. Cell* **15**, 568–577.
- 920 **Leader, D. P., Krause, S. A., Pandit, A., Davies, S. A. and Dow, J. A. T.** (2018).  
921 FlyAtlas 2: A new version of the Drosophila melanogaster expression atlas with  
922 RNA-Seq, miRNA-Seq and sex-specific data. *Nucleic Acids Res.* **46**, D809–D815.
- 923 **Lenth, R. V.** (2016). Least-squares means: The R package lsmeans. *J. Stat. Softw.*
- 924 **Lesperance, D. N. A. and Broderick, N. A.** (2020). Meta-analysis of Diets Used in  
925 Drosophila Microbiome Research and Introduction of the Drosophila Dietary  
926 Composition Calculator (DDCC). *G3; Genes|Genomes|Genetics* g3.401235.2020.
- 927 **Libert, S., Zwiener, J., Chu, X., VanVoorhies, W., Roman, G. and Pletcher, S. D.**  
928 (2007). Regulation of Drosophila life span by olfaction and food-derived odors.  
929 *Science.* **315**, 1133-1137.
- 930 **Ludington, W. B. and Ja, W. W.** (2020). Drosophila as a model for the gut microbiome.  
931 *PLoS Pathog.* **16**, e1008398.
- 932 **Luong, N., Davies, C. R., Wessells, R. J., Graham, S. M., King, M. T., Veech, R.,**  
933 **Bodmer, R. and Oldham, S. M.** (2006). Activated FOXO-mediated insulin  
934 resistance is blocked by reduction of TOR activity. *Cell Metab.* **4**, 133-142.
- 935 **Martino, M., Ma, D. and Leulier, F.** (2017). Microbial influence on Drosophila biology.  
936 *Curr. Opin. Microbiol.* **38**, 165–170.
- 937 **Martino, M. E., Joncour, P., Leenay, R., Gervais, H., Shah, M., Hughes, S., Gillet,**  
938 **B., Beisel, C. and Leulier, F.** (2018). Bacterial Adaptation to the Host's Diet Is a  
939 Key Evolutionary Force Shaping Drosophila-Lactobacillus Symbiosis. *Cell Host*  
940 *Microbe.* **24**, 109–119.
- 941 **Mateos, L., Akterin, S., Gil-Bea, F. J., Spulber, S., Rahman, A., Björkhem, I.,**  
942 **Schultzberg, M., Flores-Morales, A. and Cedazo-Minguez, A.** (2009). Activity-  
943 regulated cytoskeleton-associated protein in rodent brain is down-regulated by high  
944 fat diet in vivo and by 27-hydroxycholesterol in vitro. *Brain Pathol.* **19**, 69-80.
- 945 **Matos, R. C., Schwarzer, M., Gervais, H., Courtin, P., Joncour, P., Gillet, B., Ma, D.,**  
946 **Bulteau, A.-L., Martino, M. E., Hughes, S., et al.** (2017). D-Alanylation of teichoic  
947 acids contributes to Lactobacillus plantarum-mediated Drosophila growth during  
948 chronic undernutrition. *Nat. Microbiol.* **2**, 1635-1647.
- 949 **Mattaliano, M. D., Montana, E. S., Parisky, K. M., Littleton, J. T. and Griffith, L. C.**  
950 (2007). The Drosophila ARC homolog regulates behavioral responses to starvation.

- 951 *Mol. Cell. Neurosci.* **36**, 211–221.
- 952 **McBrayer, Z., Ono, H., Shimell, M. J., Parvy, J. P., Beckstead, R. B., Warren, J. T.,**  
953 **Thummel, C. S., Dauphin-Villemant, C., Gilbert, L. I. and O'Connor, M. B.**  
954 (2007). Prothoracicotropic Hormone Regulates Developmental Timing and Body  
955 Size in *Drosophila*. *Dev. Cell.* **13**, 857-871.
- 956 **McFall-Ngai, M., Hadfield, M. G., Bosch, T. C. G., Carey, H. V, Domazet-Lošo, T.,**  
957 **Douglas, A. E., Dubilier, N., Eberl, G., Fukami, T., Gilbert, S. F., et al.** (2013).  
958 Animals in a bacterial world, a new imperative for the life sciences. *Proc. Natl.*  
959 *Acad. Sci.* **110**, 3229–3236.
- 960 **Mirth, C., Truman, J. W. and Riddiford, L. M.** (2005). The role of the prothoracic gland  
961 in determining critical weight for metamorphosis in *Drosophila melanogaster*. *Curr.*  
962 *Biol.* **15**, 1769-1807.
- 963 **Montana, E. S. and Littleton, J. T.** (2006). Expression profiling of a hypercontraction-  
964 induced myopathy in *Drosophila* suggests a compensatory cytoskeletal remodeling  
965 response. *J. Biol. Chem.* **10**, 421.
- 966 **Morgulis, A., Coulouris, G., Raytselis, Y., Madden, T. L., Agarwala, R. and**  
967 **Schäffer, A. A.** (2008). Database indexing for production MegaBLAST searches.  
968 *Bioinformatics*, **24**, 1757–1764.
- 969 **Mosher, J., Zhang, W., Blumhagen, R. Z., D'Alessandro, A., Nemkov, T., Hansen,**  
970 **K. C., Hesselberth, J. R. and Reis, T.** (2015). Coordination between *Drosophila*  
971 *Arc1* and a specific population of brain neurons regulates organismal fat. *Dev. Biol.*  
972 **405**, 280–290.
- 973 **Murphy, E. A., Velazquez, K. T. and Herbert, K. M.** (2015). Influence of high-fat diet  
974 on gut microbiota: A driving force for chronic disease risk. *Curr. Opin. Clin. Nutr.*  
975 *Metab. Care.* **18**, 515-520.
- 976 **Musselman, L. P., Fink, J. L., Narzinski, K., Ramachandran, P. V., Hathiramani, S.**  
977 **S., Cagan, R. L. and Baranski, T. J.** (2011). A high-sugar diet produces obesity  
978 and insulin resistance in wild-type *Drosophila*. *Dis. Model. Mech.* **4**, 842-849.
- 979 **Musselman, L. P., Fink, J. L., Maier, E. J., Gatto, J. A., Brent, M. R. and Baranski,**  
980 **T. J.** (2018). Seven-up is a novel regulator of insulin signaling. *Genetics.* **208**,  
981 1643-1656.
- 982 **Newell, P. D. and Douglas, A. E.** (2014). Interspecies Interactions Determine the  
983 Impact of the Gut Microbiota on Nutrient Allocation in *Drosophila melanogaster*.  
984 *Appl. Environ. Microbiol.* **80**, 788–796.
- 985 **Oldroyd, H.** (1951). Biology of *Drosophila*. *Nature*.
- 986 **Pastuzyn, E. D., Day, C. E., Kearns, R. B., Kyrke-Smith, M., Taibi, A. V.,**  
987 **McCormick, J., Yoder, N., Belnap, D. M., Erlendsson, S., Morado, D. R., et al.**  
988 (2018). The Neuronal Gene *Arc* Encodes a Repurposed Retrotransposon Gag  
989 Protein that Mediates Intercellular RNA Transfer. *Cell.* **172**, 275-288.e18.
- 990 **Petkau, K., Ferguson, M., Guntermann, S. and Foley, E.** (2017). Constitutive Immune  
991 Activity Promotes Tumorigenesis in *Drosophila* Intestinal Progenitor Cells. *Cell*  
992 *Rep.* **20**, 1784–1793.
- 993 **Ponton, F., Chapuis, M. P., Pernice, M., Sword, G. A. and Simpson, S. J.** (2011).  
994 Evaluation of potential reference genes for reverse transcription-qPCR studies of  
995 physiological responses in *Drosophila melanogaster*. *J. Insect Physiol.* **57**, 840–  
996 850.

- 997 **Redhai, S., Pilgrim, C., Gaspar, P., Giesen, L. van, Lopes, T., Riabinina, O.,**  
998 **Grenier, T., Milona, A., Chanana, B., Swadling, J. B., et al. (2020).** An intestinal  
999 zinc sensor regulates food intake and developmental growth. *Nature*. **580**, 263-268.
- 1000 **Rivera, O., McHan, L., Konadu, B., Patel, S., Sint Jago, S. and Talbert, M. E. (2019).**  
1001 A high-fat diet impacts memory and gene expression of the head in mated female  
1002 *Drosophila melanogaster*. *J. Comp. Physiol. B*. **189**, 179-198.
- 1003 **Robertson, F. W. (1963).** The ecological genetics of growth in *Drosophila*: 6. The  
1004 genetic correlation between the duration of the larval period and body size in  
1005 relation to larval diet. *Genet. Res.* **4**, 74-92.
- 1006 **Robertson, R. C., Manges, A. R., Finlay, B. B. and Prendergast, A. J. (2019).** The  
1007 Human Microbiome and Child Growth – First 1000 Days and Beyond. *Trends*  
1008 *Microbiol.* **27**, 131-147.
- 1009 **Rulifson, E. J., Kim, S. K. and Nusse, R. (2002).** Ablation of insulin-producing neurons  
1010 in flies: Growth and diabetic phenotypes. *Science*. **296**, 1118-1120.
- 1011 **Saichana, N., Matsushita, K., Adachi, O., Frébort, I. and Frebortova, J. (2015).**  
1012 Acetic acid bacteria: A group of bacteria with versatile biotechnological  
1013 applications. *Biotechnol. Adv.* **33**, 1260-1271.
- 1014 **Sampson, T. R. and Mazmanian, S. K. (2015).** Control of brain development, function,  
1015 and behavior by the microbiome. *Cell Host Microbe* **17**, 565–576.
- 1016 **Sannino, D. R., Dobson, A. J., Edwards, K., Angert, E. R. and Buchon, N. (2018).**  
1017 The *Drosophila melanogaster* Gut Microbiota Provisions Thiamine to Its Host. *MBio*  
1018 **9**, e00155-18.
- 1019 **Schindelin, J., Arganda-Carreras, I., Frise, E., Kaynig, V., Longair, M., Pietzsch, T.,**  
1020 **Preibisch, S., Rueden, C., Saalfeld, S., Schmid, B., et al. (2012).** Fiji: An open-  
1021 source platform for biological-image analysis. *Nat. Methods*. **9**, 676-682.
- 1022 **Sekirov, I., Russell, S. L., Antunes, L. C. M. and Finlay, B. B. (2010).** Gut Microbiota  
1023 in Health and Disease. *Physiol. Rev.* **90**, 859–904.
- 1024 **Shandilya, M. C. V. and Gautam, A. (2020).** Hippocampal Arc Induces Decay of  
1025 Object Recognition Memory in Male Mice. *Neuroscience*. **431**, 193-204.
- 1026 **Shen, J., Obin, M. S. and Zhao, L. (2013).** The gut microbiota, obesity and insulin  
1027 resistance. *Mol. Aspects Med.* **34**, 39–58.
- 1028 **Shepherd, J. D. and Bear, M. F. (2011).** New views of Arc, a master regulator of  
1029 synaptic plasticity. *Nat. Neurosci.* **14**, 279–284.
- 1030 **Shin, S. C., Kim, S.-H., You, H., Kim, B., Kim, A. C., Lee, K.-A., Yoon, J.-H., Ryu, J.-**  
1031 **H. and Lee, W.-J. (2011).** *Drosophila* Microbiome Modulates Host Developmental  
1032 and Metabolic Homeostasis via Insulin Signaling. *Science*. **334**, 670–674.
- 1033 **Smith, K., McCoy, K. D. and Macpherson, A. J. (2007).** Use of axenic animals in  
1034 studying the adaptation of mammals to their commensal intestinal microbiota.  
1035 *Semin. Immunol.* **19**, 59-69.
- 1036 **Storelli, G., Defaye, A., Erkosar, B., Hols, P., Royet, J. and Leulier, F. (2011).**  
1037 *Lactobacillus plantarum* promotes *drosophila* systemic growth by modulating  
1038 hormonal signals through TOR-dependent nutrient sensing. *Cell Metab.* **14**, 403–  
1039 414.
- 1040 **Storelli, G., Strigini, M., Grenier, T., Bozonnet, L., Schwarzer, M., Daniel, C., Matos,**  
1041 **R. and Leulier, F. (2017).** *Drosophila* Perpetuates Nutritional Mutualism by  
1042 Promoting the Fitness of Its Intestinal Symbiont *Lactobacillus plantarum*. *Cell*

1043 *Metab.* **27**, 362-377.

1044 **Strigini, M. and Leulier, F.** (2016). The role of the microbial environment in *Drosophila*  
1045 post-embryonic development. *Dev. Comp. Immunol.* **64**, 39–52.

1046 **Team, R. C.** (2019). R: A Language and Environment for Statistical Computing. *Vienna,*  
1047 *Austria.*

1048 **Therneau, T.** (2012). A Package for Survival Analysis in S. R package version. *Survival*  
1049 *(Lond).*

1050 **Troha, K. and Buchon, N.** (2019). Methods for the study of innate immunity in  
1051 *Drosophila melanogaster.* *Wiley Interdiscip. Rev. Dev. Biol.* **8**, e344.

1052 **Verdu, J., Buratovicht, M. A., Wilder, E. L. and Birnbaum, M. J.** (1999). Cell-  
1053 autonomous regulation of cell and organ growth in *Drosophila* by Akt/PKB. *Nat. Cell*  
1054 *Biol.* **1**, 500-506.

1055 **Wall, M. J. and Corrêa, S. A. L.** (2018). The mechanistic link between Arc/Arg3.1  
1056 expression and AMPA receptor endocytosis. *Semin. Cell Dev. Biol.* **77**, 17-24.

1057 **Wong, A. C., Dobson, A. J. and Douglas, A. E.** (2014). Gut microbiota dictates the  
1058 metabolic response of *Drosophila* to diet. *J Exp Biol* **217**, 1894–1901.

1059 **Zhao, B., Tumaneng, K. and Guan, K. L.** (2011). The Hippo pathway in organ size  
1060 control, tissue regeneration and stem cell self-renewal. *Nat. Cell Biol.* **13**, 877-883.

1061

1062

1063

1064

1065

1066

1067

1068

1069

1070

1071

1072

1073

1074

1075

1076

1077

1078

1079

1080

1081

1082

1083

1084

1085

1086

1087

1088



1089 **FIGURES**

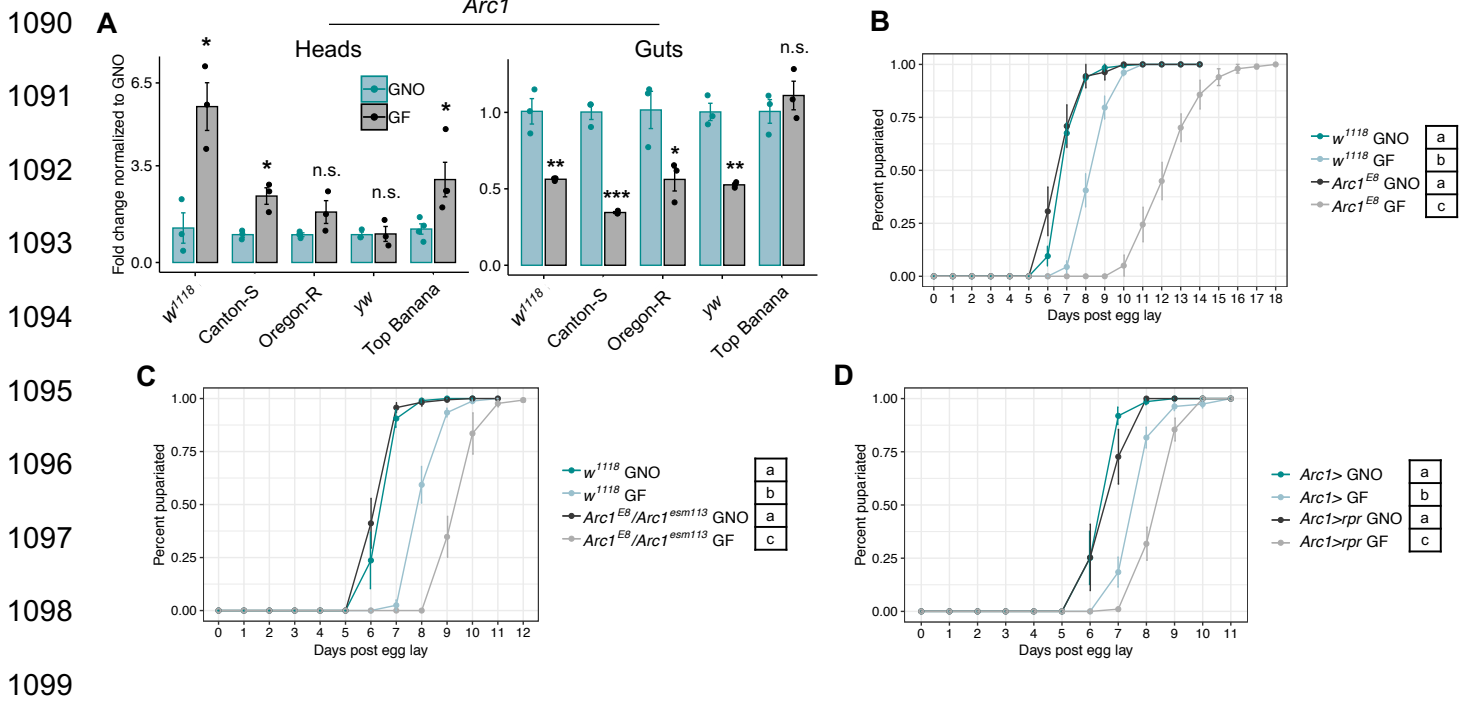

1100 **Figure 1. *Arc1* exhibits tissue-specific microbiota-dependent expression changes,**  
 1101 **and loss of *Arc1* exacerbates the developmental delay of GF larvae. A.** RT-qPCR  
 1102 analysis of *Arc1* transcripts in heads and guts of 5-day-old adult male wild-type flies.  
 1103 Individual points represent normalized values for each replicate: n=3-4 per condition, 10  
 1104 animals per replicate. Error bars represent standard error. \* p<0.05, \*\* p<0.01, \*\*\*  
 1105 p<0.001, n.s. = not significant Student's t-test. **B,C.** Developmental time courses of  
 1106 GNO and GF wild-type/control vs. *Arc1* mutant animals, and **D.** larvae with *Arc1*-  
 1107 expressing cells ablated. *Arc1>*: *Arc1-Gal4* crossed to *w<sup>1118</sup>* background control,  
 1108 *Arc1>rpr*: *Arc1-GAL4* crossed to *UAS-reaper*. Error bars represent standard error.  
 1109 Conditions sharing letters are not statistically different from one another, two-way  
 1110 ANOVA with Tukey's post-hoc test. For all developmental rate experiments, see Table  
 1111 S1 for full sample sizes and statistical results.

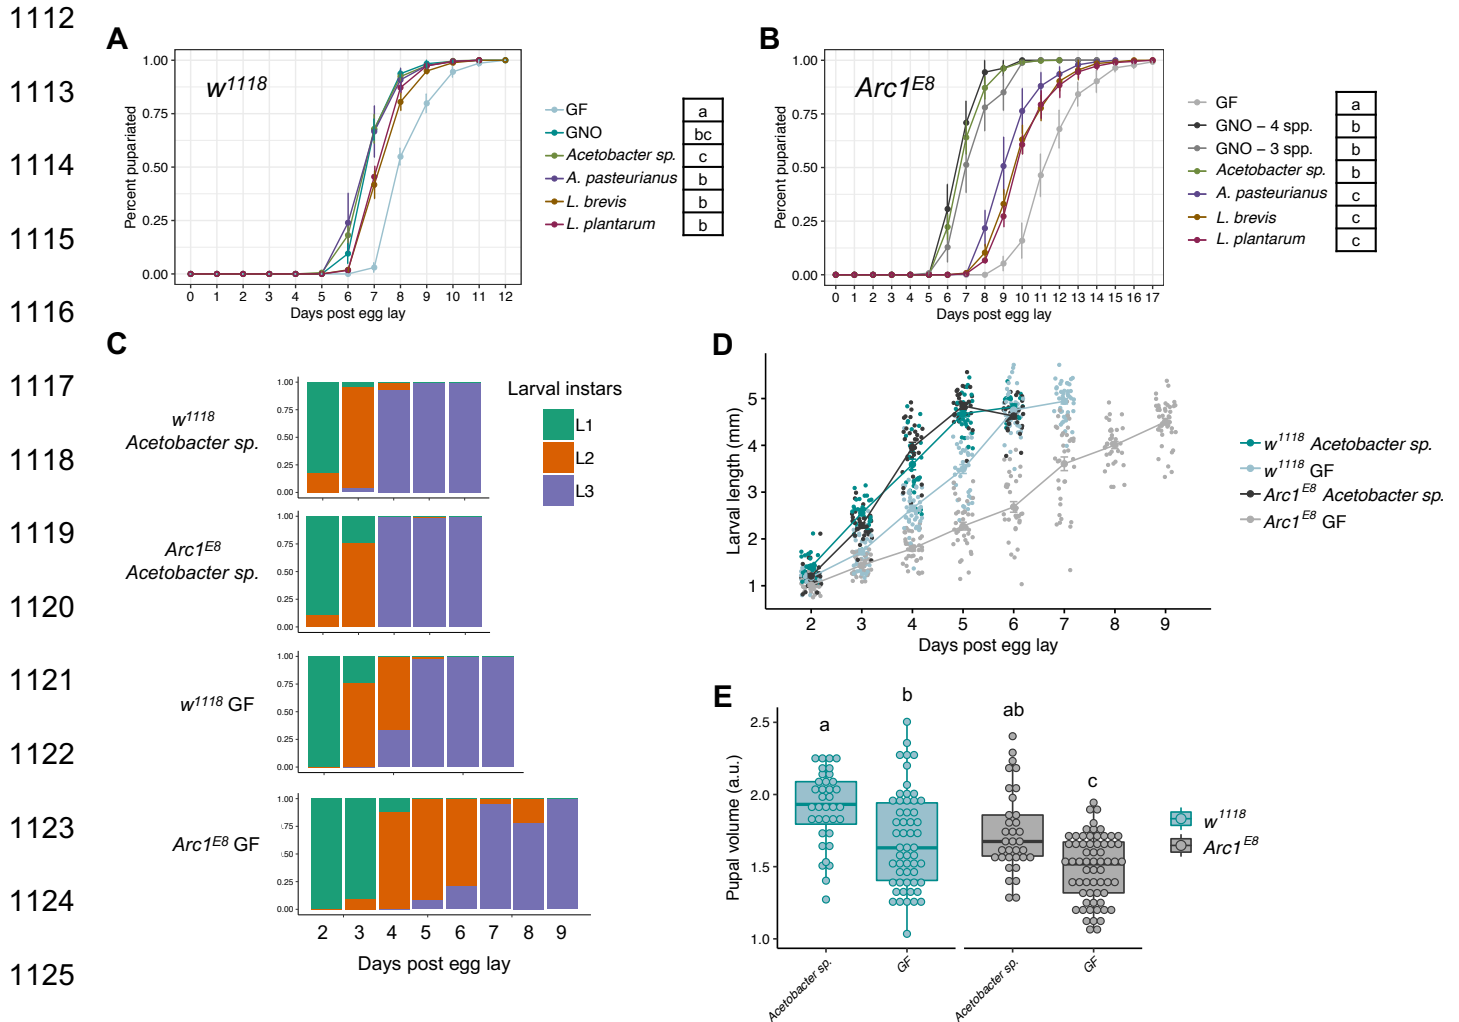

1127 **Figure 2. Monoassociation with *Acetobacter sp.* promotes development of *Arc1***  
 1128 **mutant larvae. A, B.** Time to pupariation for wild-type and *Arc1* mutant animals  
 1129 monoassociated with each of the four bacterial isolates comprising the GNO condition.  
 1130 GNO–3spp.: gnotobiotic community consisting of *A. pasteurianus*, *L. brevis*, and *L.*  
 1131 *plantarum*. Conditions sharing letters are not statistically different from one another,  
 1132 one-way ANOVA with Tukey’s post-hoc test. **C.** Percentage of larvae in the indicated  
 1133 instar stage daily until 100% of the population reaches the pre-wandering or wandering  
 1134 third instar stage. Data represent pooled percentages from three biological replicates for

1135 each day, ~30-60 animals per day. **D.** Larval length for both genotypes and microbial  
1136 conditions over time. Each data point represents an individual larva, three biological  
1137 replicates, ~10-20 larvae per replicate. Error bars represent standard error. **E.** Pupal  
1138 volume for each genotype and microbial condition. Each data point represents an  
1139 individual pupa. Conditions that share a letter are not statistically different from one  
1140 another, two-way ANOVA with Tukey's post-hoc test.

1141

1142

1143

1144

1145

1146

1147

1148

1149

1150

1151

1152

1153

1154

1155

1156

1157



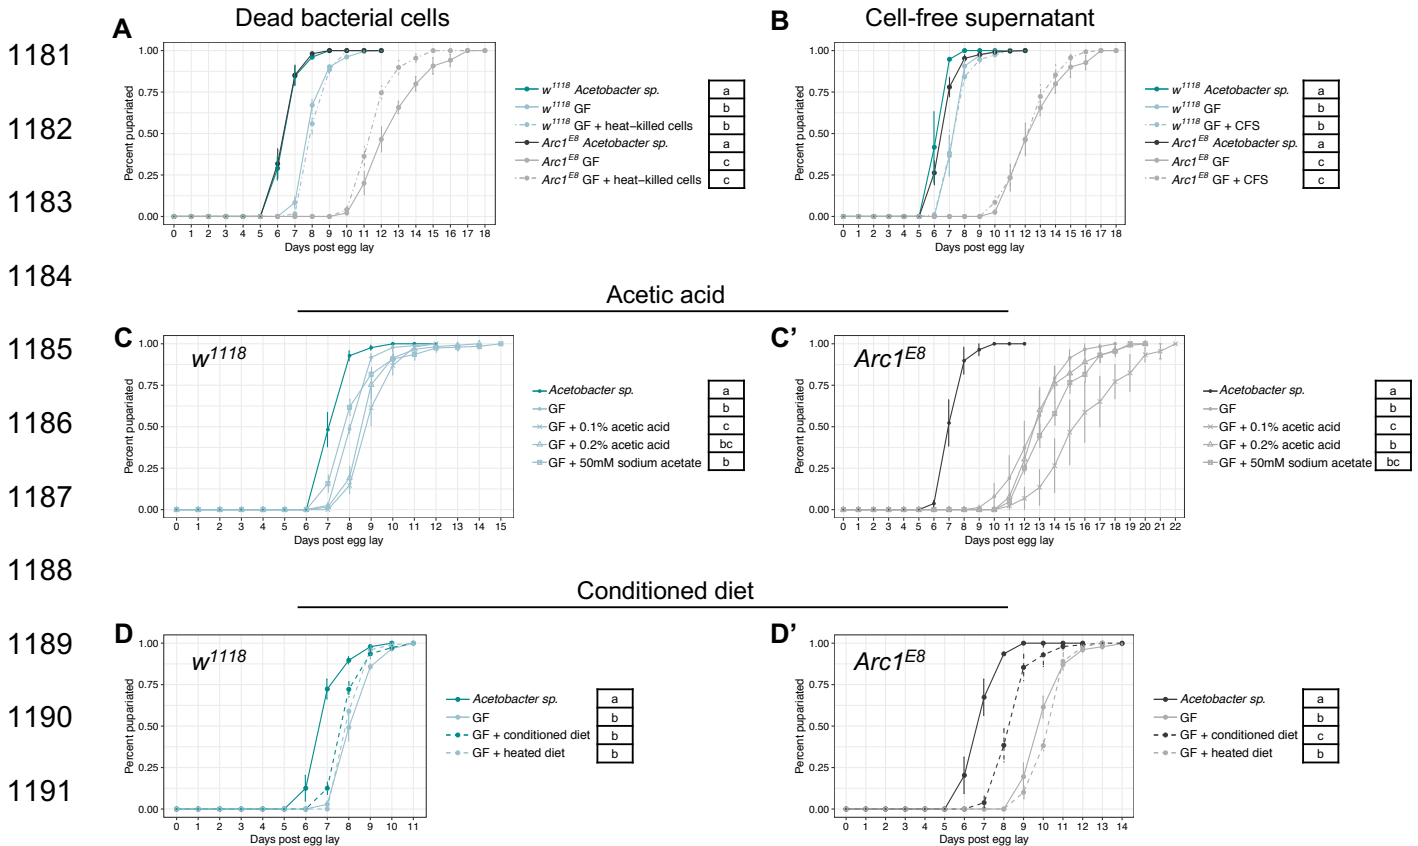

**Figure 4. *Acetobacter sp.*-conditioned diet accelerates the development of *Arc1* mutants.** **A.** Daily administration of heat-killed *Acetobacter sp.* planktonic culture has minimal effect on developmental rate of GF wild-type or *Arc1<sup>E8</sup>* larvae. Two-way ANOVA with Tukey's post-hoc test. **B.** Daily administration of filtered supernatant from *Acetobacter sp.* planktonic culture has no effect on developmental rate of GF wild-type or *Arc1<sup>E8</sup>* larvae. Two-way ANOVA with Tukey's post-hoc test. **C, C'.** Rearing GF wild-type and *Arc1* mutant larvae on diets containing acetic acid either further extends or has no effect on the larval developmental delay. Each panel analyzed by one-way ANOVA with Tukey's post-hoc test. **D, D'.** Rearing GF larvae on sterile diet that has been pre-conditioned with *Acetobacter sp.* for five days (GF + conditioned diet) has no effect on wild-type but partially restores developmental rate of *Arc1<sup>E8</sup>* animals. GF + heated diet:

1204 GF larvae reared on GF diet heated under the same conditions used to kill *Acetobacter*  
1205 *sp.* after pre-conditioning. Each panel analyzed by one-way ANOVA with Tukey's post-  
1206 hoc test. Throughout, conditions that share a letter are not statistically different from one  
1207 another.

1208

1209

1210

1211

1212

1213

1214

1215

1216

1217

1218

1219

1220

1221

1222

1223

1224

1225

1226

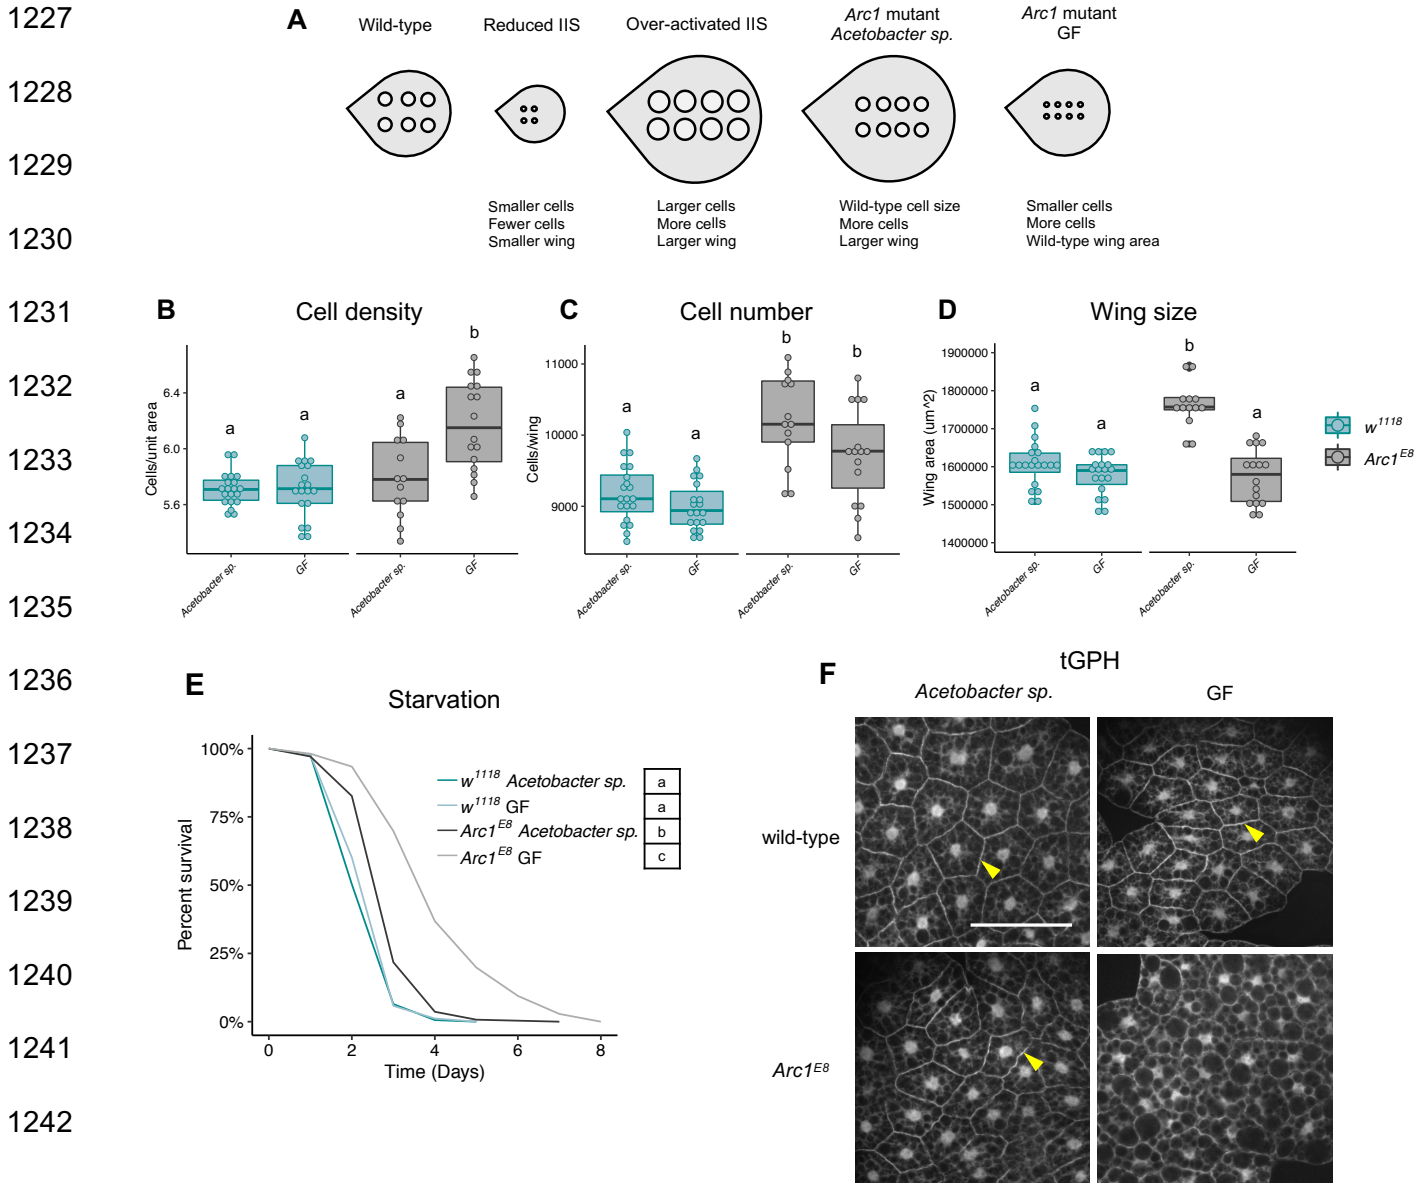

1244 **Figure 5. GF *Arc1* mutants exhibit phenotypes consistent with insulin signaling**

1245 **defects. A.** Schematic representing impacts of insulin signaling manipulations and *Arc1*

1246 mutation-microbial condition interactions on wing organ properties. **B-D.** Wing

1247 morphological parameters for wild-type and *Arc1<sup>E8</sup>* females under *Acetobacter* sp.-

1248 associated and GF conditions. Each point represents an individual wing. Each panel

1249 analyzed by two-way ANOVA with Tukey's post-hoc test. **E.** Survival curves for adult

1250 female wild-type and *Arc1* mutant *Acetobacter sp.*-associated and GF animals  
1251 transferred to starvation conditions 5-7 days post-eclosion. Data represent pooled  
1252 results from three biological replicates, ~50-120 animals per condition per replicate.  
1253 Statistical results represent Cox proportional-hazards model analysis. Conditions that  
1254 share a letter are not statistically different from one another. **F.** Representative images  
1255 showing GFP-tagged plextrin homology domain (tGPH) localization in the fat bodies of  
1256 pre-wandering third instar larvae of the indicated genotypes and microbial conditions.  
1257 Scale bar=100 $\mu$ m. Arrowheads indicate membrane-localized fluorescent signal.
